# Supplementary material for: Modular synthesis of dihydro-isoquinolines: palladium-catalyzed sequential C(sp2)–H and C(sp3)–H bond activation
Source: Royal Society of Chemistry journal article supplement (doi:10.1039/c5sc01482d), 2015-01-01
Supplement: c5sc01482d1.pdf [file c5sc01482d1.pdf]

## Modular synthesis of dihydro-isoquinolines: Palladium-catalyzed sequential C(sp<sup>2</sup>)-H and C(sp<sup>3</sup>)-H bonds activation

Weidong Liu, Qingzhen Yu, Le'an Hu, Zenghua Chen, Jianhui Huang\*

*Tianjin Key Laboratory for Modern Drug Delivery & High-Efficiency,  
School of Pharmaceutical Science and Technology, Tianjin University,  
92 Weijin Road, Nankai District, Tianjin, P. R. China, 300072  
email: jhuang@tju.edu.cn*

### Supporting Information

|                                                                                                          |    |
|----------------------------------------------------------------------------------------------------------|----|
| General Information .....                                                                                | 2  |
| General Procedures .....                                                                                 | 3  |
| General Procedure A: Synthesis of <i>N</i> -methoxybenzamides.....                                       | 3  |
| General Procedure B: Synthesis of <i>N</i> -isopropoxybenzamide .....                                    | 3  |
| General Procedure C: Synthesis of <i>N</i> -alkoxyl dihydroisoquinolones by amide<br>with peroxide ..... | 4  |
| General Procedure D: Synthesis of <i>N</i> -alkoxyl dihydroisoquinolones by amide<br>with alcohol .....  | 9  |
| References .....                                                                                         | 16 |
| <sup>1</sup> H and <sup>13</sup> C NMR Spectra .....                                                     | 17 |
| X-ray Structure and Data of <b>18a</b> .....                                                             | 36 |

**General Information**

Flash chromatography was performed on silica gel 100-200 m. The solvent system used was a gradient of petroleum ether/ethyl acetate, increasing in polarity to ethyl acetate. Thin layer chromatography (TLC) was performed on glass backed plates pre-coated with silica (GF254), which were developed using standard visualizing agents.  $^1\text{H}$  and  $^{13}\text{C}$  NMR spectra were recorded on a 600 MHz or 400 MHz BRUKER AVANCE spectrometer at 25 °C.  $^1\text{H}$ : Chemical shifts are reported in ppm with the solvent resonance as the internal standard ( $\text{CHCl}_3$ :  $\delta$  7.26 ppm). Data are reported as follows: chemical shift, multiplicity (s = singlet, d = doublet, t = triplet, m = multiplet), integration, coupling constants ( $J$ ) in Hz.  $^{13}\text{C}$  NMR spectra were recorded with complete proton decoupling. Chemical shifts are reported in ppm with the solvent resonance as the internal standard ( $\text{CDCl}_3$ :  $\delta$  77.0 ppm). Low resolution mass spectra were recorded on Micromass Autospec, operating in Agilent GC-MS operating in either E.I. or C.I mode. High-resolution mass spectra (HRMS) recorded for accurate mass analysis, were performed on either a Q-TOF micro (Bruker Compass Data Analysis 4.0) spectrometer. Melting points were performed on recrystallised solids and recorded on a national standard melting point apparatus and are uncorrected.

## General Procedures:

The *N*-methoxybenzamides<sup>1-8</sup> and *N*-methylbenzamide<sup>9</sup> were prepared following literature procedure and the analytical data are agreed with those data which have been reported previously.

### General Procedure A: Synthesis of *N*-methoxybenzamides

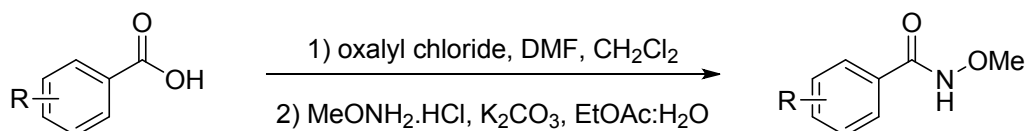

Following same procedure by Guimond *et. al*<sup>1</sup>

To a solution of the carboxylic acid (10 mmol) in CH<sub>2</sub>Cl<sub>2</sub> (0.3 M) at 0 °C under N<sub>2</sub> was added dropwise oxalyl chloride (12 mmol) followed by a catalytic amount of DMF (2 drops). The reaction was allowed to stir at room temperature until completion (typically 4h). The solvent was then removed under reduce pressure to afford the corresponding crude acid chloride. Methoxyamine hydrochloride (11 mmol) was added to a biphasic mixture of K<sub>2</sub>CO<sub>3</sub> (20 mmol) in a 2:1 mixture of EtOAc:H<sub>2</sub>O (0.2 M). The resulting solution was cooled to 0°C followed by addition of a solution unpurified acid chloride in a minimum amount of EtOAc dropwise. The flask containing the acid chloride was then rinsed with additional EtOAc. The reaction was stirring for 4h and slowly warmed up to room temperature. The two layers were separated and extracted with EtOAc (20 mL x 2). The combined organic phase was dried over anhydrous Na<sub>2</sub>SO<sub>4</sub>, filtered, and evaporated under reduced pressure. The residue was purified by flash column chromatography on silica gel.

### General Procedure B: Synthesis of *N*-isopropoxybenzamide

The amide **171** was prepared by following the procedure reported by A. Nickon *et al*<sup>6</sup>, and the analytical data are consistently agreed with those ones are reported in the literature.<sup>7</sup>

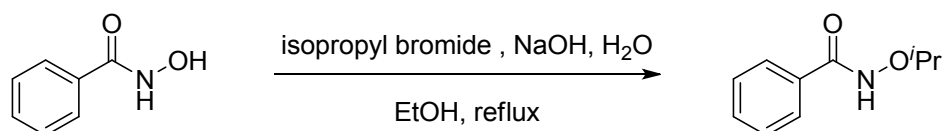

Following similar procedure reported by Nickon *et. al*<sup>6</sup>

Benzohydroxamic acid<sup>8</sup> (3 mmol) was added into a solution of sodium hydroxide (4.5 mmol) in 1.5 mL H<sub>2</sub>O, the mixture was warmed to 50 °C until the solids were dissolved, the resulting solution was added to isopropyl bromide (15 mmol) in absolute ethanol (6 mL), and the mixture was heated to reflux for 5 h. After the reaction was completed, the solvents were removed under reduced pressure. The residue was dissolved in EtOAc (20 mL), washed with H<sub>2</sub>O (15 mL x 2). The organic layer was dried over anhydrous Na<sub>2</sub>SO<sub>4</sub>, filtered, and evaporated under reduced pressure. The crude product was purified by flash column chromatography on silica gel.

### General Procedure C: Synthesis of *N*-alkoxyl dihydroisoquinolones by amide with peroxide

A solution of amide (0.2 mmol), peroxide (0.8 mmol), Pd(OAc)<sub>2</sub> (10 mol%) and TFA (5.0 mmol) in *c*-hex (1.0 mL) was heated in 100 °C under air for 20 min. After the reaction was completed, the reaction mixture was allowed to cool down to room temperature and saturated aqueous NaHCO<sub>3</sub> (20 mL) was added. The resulting mixture was extracted with EtOAc (20 mL x 3). The organic layer was dried over anhydrous Na<sub>2</sub>SO<sub>4</sub>, filtered and the solvent was removed under reduced pressure to provide the crude product. The purification was performed by flash column chromatography on silica gel.

**Table 1.** Reaction condition screening

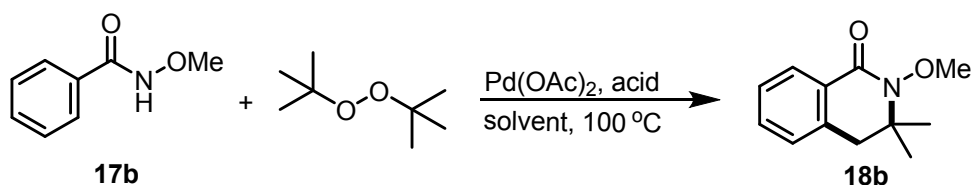

| Entry <sup>[a]</sup> | Solvent   | Acid       | Equiv.    | Yield      |
|----------------------|-----------|------------|-----------|------------|
| 1                    | DCE       | TFA        | 20        | 30%        |
| 2                    | THF       | TFA        | 20        | 0%         |
| 3                    | AcOH      | TFA        | 20        | 69%        |
| 4                    | Cy        | TFA        | 20        | 75%        |
| 5                    | Cy        | TFA        | 10        | 55%        |
| <b>6</b>             | <b>Cy</b> | <b>TFA</b> | <b>25</b> | <b>89%</b> |
| 7                    | Cy        | TFA        | 30        | 82%        |
| <b>8</b>             | <b>Cy</b> | <b>TFA</b> | <b>35</b> | <b>77%</b> |
| 9                    | Cy        | HFBA       | 25        | <b>85%</b> |

[a] Reaction conditions: Benzamide **17b** (0.2 mmol), DTBP (0.8 mmol), Pd(OAc)<sub>2</sub> (10 mol%), acid (10-35 equiv.) at 100 °C in solvent (0.2 M), 20 min-1 h.

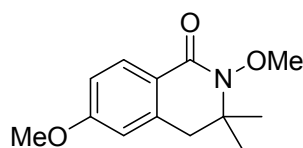

### 2,6-Dimethoxy-3,3-dimethyl-3,4-dihydroisoquinolin-1(2H)-one (**18a**)

Following the general procedure C, dihydroisoquinolinone **18a** (39 mg, 83%) was isolated as a white solid: Mp 57-59 °C; <sup>1</sup>H NMR (600 MHz, CDCl<sub>3</sub>): δ 8.06 (d, *J* = 9.0 Hz, 1H), 6.85 (dd, *J* = 7.2, 1.8 Hz, 1H), 6.64 (d, *J* = 1.2 Hz, 1H), 3.92 (s, 3H), 3.85 (s, 3H), 3.02 (s, 2H), 1.37 (s, 6H); <sup>13</sup>C NMR (150 MHz, CDCl<sub>3</sub>): δ 165.3, 162.9, 138.3, 130.4, 120.9, 112.6, 112.5, 64.5, 61.9, 55.4, 43.5, 24.7; HRMS (ESI) *m/z* calcd for C<sub>13</sub>H<sub>17</sub>NO<sub>3</sub> (M+Na) 258.1106; found 258.1113.

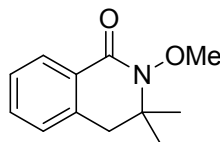

### 2-Methoxy-3,3-dimethyl-3,4-dihydroisoquinolin-1(2H)-one (**18b**)

Following the general procedure C, dihydroisoquinolinone **18b** (37 mg, 89%) was isolated as a colorless oil; <sup>1</sup>H NMR (600 MHz, CDCl<sub>3</sub>): δ 8.12 (d, *J* = 7.2 Hz, 1H), 7.46 (t, *J* = 7.2 Hz, 1H), 7.35 (t, *J* = 7.5 Hz, 1H), 7.16 (d, *J* = 7.8 Hz, 1H), 3.94 (s, 3H), 3.08 (s, 2H), 1.39 (s, 6H); <sup>13</sup>C NMR (150 MHz, CDCl<sub>3</sub>): δ 165.0, 136.1, 132.6, 128.2,

127.6, 127.0, 64.5, 62.1, 43.2, 24.8; HRMS (ESI)  $m/z$  calcd for  $C_{12}H_{15}NO_2$  (M+H) 206.1181; found 206.1181.

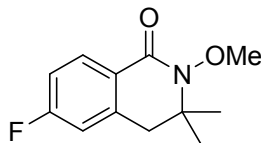

**6-Fluoro-2-methoxy-3,3-dimethyl-3,4-dihydroisoquinolin-1(2H)-one (18c)**

Following the general procedure C, dihydroisoquinolinone **18c** (37.0 mg, 83%) was isolated as a white solid: Mp 87-89 °C;  $^1H$  NMR (400 MHz,  $CDCl_3$ ):  $\delta$  8.13 (dd,  $J$  = 8.6, 5.8 Hz, 1H), 7.02 (td,  $J$  = 8.6, 2.4 Hz, 1H), 6.85 (dd,  $J$  = 8.7, 2.2 Hz, 1H), 3.93 (s, 3H), 3.06 (s, 2H), 1.39 (s, 6H);  $^{13}C$  NMR (100 MHz,  $CDCl_3$ ):  $\delta$  166.5, 164.2, 164.0, 138.9 (d,  $J_{C-F}$  = 8.9 Hz), 131.1 (d,  $J_{C-F}$  = 9.5 Hz), 124.6 (d,  $J_{C-F}$  = 2.8 Hz), 114.4 (dd,  $J_{C-F}$  = 18.8, 3.2 Hz), 64.5, 61.9, 43.2, 24.8; HRMS (ESI)  $m/z$  calcd for  $C_{12}H_{14}FNO_2$  (M+H) 224.1087; found 224.1085.

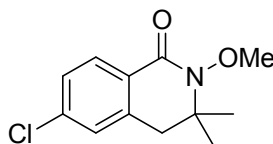

**6-Chloro-2-methoxy-3,3-dimethyl-3,4-dihydroisoquinolin-1(2H)-one (18d)**

Following the general procedure C, dihydroisoquinolinone **18d** (36 mg, 75%) was isolated as a white solid: Mp 84-86 °C;  $^1H$  NMR (600 MHz,  $CDCl_3$ ):  $\delta$  7.98 (d,  $J$  = 8.4 Hz, 1H), 7.24 (dd,  $J$  = 8.3, 1.5 Hz, 1H), 7.08 (s, 1H), 3.85 (s, 3H), 2.96 (s, 2H), 1.31 (s, 6H);  $^{13}C$  NMR (150 MHz,  $CDCl_3$ ):  $\delta$  164.1, 138.6, 137.8, 129.9, 127.6, 127.4, 126.7, 64.5, 61.9, 43.0, 24.8; HRMS (ESI)  $m/z$  calcd for  $C_{12}H_{14}^{35}ClNO_2$  (M+H) 240.0791; found 240.0791.

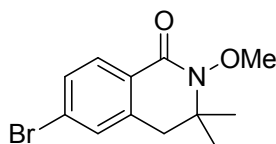

**6-Bromo-2-methoxy-3,3-dimethyl-3,4-dihydroisoquinolin-1(2H)-one (18e)**

Following the general procedure C, dihydroisoquinolinone **18e** (45 mg, 80%) was isolated as a white solid: Mp 102-104 °C;  $^1H$  NMR (600 MHz,  $CDCl_3$ ):  $\delta$  7.98 (d,  $J$  = 8.3 Hz, 1H), 7.53 – 7.43 (d, 1H), 7.33 (s, 1H), 3.93 (s, 3H), 3.04 (s, 2H), 1.38 (s, 6H);  $^{13}C$  NMR (150 MHz,  $CDCl_3$ ):  $\delta$  164.2, 137.9, 130.6, 130.4, 130.0, 127.2 (9), 127.2 (8),

64.5 (d,  $J = 2.8$  Hz), 62.0, 42.9, 24.8; HRMS (ESI)  $m/z$  calcd for  $C_{12}H_{14}^{79}BrNO_2$  (M+H) 284.0286; found 284.0283.

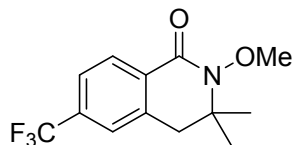

**2-Methoxy-3,3-dimethyl-6-(trifluoromethyl)-3,4-dihydroisoquinolin-1(2H)-one (18f)**

Following the general procedure C, dihydroisoquinolinone **18f** (24 mg, 43%) was isolated as a white solid: Mp 75-77 °C;  $^1H$  NMR (400 MHz,  $CDCl_3$ ):  $\delta$  8.26 (d,  $J = 8.1$  Hz, 1H), 7.62 (d,  $J = 8.1$  Hz, 1H), 7.29 (s, 1H), 3.97 (s, 3H), 3.15 (s, 2H), 1.43 (s, 6H);  $^{13}C$  NMR (100 MHz,  $CDCl_3$ ):  $\delta$  163.4, 134.1, 134.0 ( $J_{C-F} = 32.4$  Hz), 131.3, 128.9, 124.6 ( $J_{C-F} = 3.7$  Hz), 123.9 ( $J_{C-F} = 3.7$  Hz), 123.6 ( $J_{C-F} = 271.1$  Hz), 64.5, 61.9, 43.1, 24.9; HRMS (ESI)  $m/z$  calcd for  $C_{13}H_{14}F_3NO_2$  (M+H) 274.1055; found 274.1055.

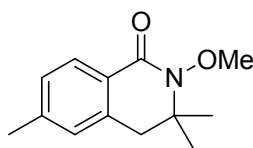

**2-Methoxy-3,3,6-trimethyl-3,4-dihydroisoquinolin-1(2H)-one (18g)**

Following the general procedure C, dihydroisoquinolinone **18g** (38.5 mg, 88%) was isolated as a colorless oil;  $^1H$  NMR (600 MHz,  $CDCl_3$ ):  $\delta$  7.99 (d,  $J = 7.8$  Hz, 1H), 7.14 (d,  $J = 7.8$  Hz, 1H), 6.95 (s, 1H), 3.92 (s, 3H), 3.02 (s, 2H), 2.37 (s, 3H), 1.37 (s, 6H);  $^{13}C$  NMR (150 MHz,  $CDCl_3$ ):  $\delta$  165.3, 143.2, 136.1, 128.3, 128.2, 127.9, 125.3, 64.4, 62.1, 43.2, 24.8, 21.6; HRMS (ESI)  $m/z$  calcd for  $C_{13}H_{17}NO_2$  (M+Na) 220.1157; found 220.1158.

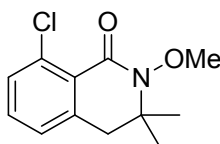

**8-Chloro-2-methoxy-3,3-dimethyl-3,4-dihydroisoquinolin-1(2H)-one (18h)**

Following the general procedure C, dihydroisoquinolinone **18h** (26 mg, 54%) was isolated as a white solid: Mp 108-110 °C;  $^1H$  NMR (400 MHz,  $CDCl_3$ ):  $\delta$  7.38 (d,  $J = 7.9$  Hz, 1H), 7.31 (t,  $J = 7.7$  Hz, 1H), 7.07 (d,  $J = 7.3$  Hz, 1H), 3.95 (s, 3H), 3.06 (s, 2H), 1.37 (s, 6H);  $^{13}C$  NMR (100 MHz,  $CDCl_3$ ):  $\delta$  162.6, 139.1, 135.6, 132.2, 131.2,

126.7, 124.6, 64.6, 60.6, 44.1, 24.8; HRMS (ESI)  $m/z$  calcd for  $C_{12}H_{14}^{35}ClNO_2$  (M+H) 240.0791; found 240.0791.

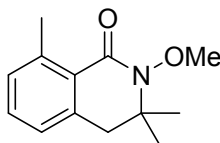

**2-Methoxy-3,3,8-trimethyl-3,4-dihydroisoquinolin-1(2H)-one (18i)**

Following the general procedure C, dihydroisoquinolinone **18i** (41 mg, 94%) was isolated as a white solid: Mp 60-62 °C;  $^1H$  NMR (400 MHz,  $CDCl_3$ ):  $\delta$  7.28 (dd,  $J$  = 9.6, 5.5 Hz, 1H), 7.12 (d,  $J$  = 7.6 Hz, 1H), 6.99 (d,  $J$  = 7.4 Hz, 1H), 3.94 (s, 3H), 3.03 (s, 2H), 2.75 (s, 3H), 1.36 (s, 6H);  $^{13}C$  NMR (100 MHz,  $CDCl_3$ ):  $\delta$  166.1, 142.1, 137.4, 131.5, 131.1, 125.9 (1), 125.9 (0), 64.5, 60.9, 44.1, 24.6, 23.2; HRMS (ESI)  $m/z$  calcd for  $C_{13}H_{17}NO_2$  (M+Na) 220.1157; found 220.1158.

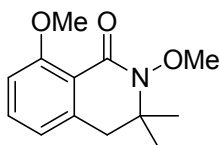

**2,8-Dimethoxy-3,3-dimethyl-3,4-dihydroisoquinolin-1(2H)-one (18j)**

Following the general procedure C, dihydroisoquinolinone **18j** (35 mg, 75%) was isolated as a white solid: Mp 61-63 °C;  $^1H$  NMR (400 MHz,  $CDCl_3$ ):  $\delta$  7.37 (t,  $J$  = 8.0 Hz, 1H), 6.88 (d,  $J$  = 8.4 Hz, 1H), 6.72 (d,  $J$  = 7.4 Hz, 1H), 3.92 (3) (s, 3H), 3.92 (0) (s, 3H), 3.01 (s, 2H), 1.35 (s, 6H);  $^{13}C$  NMR (100 MHz,  $CDCl_3$ ):  $\delta$  163.9, 160.8, 139.1, 133.3, 120.0, 116.1, 110.9, 64.4, 60.7, 56.1, 44.1, 24.7; HRMS (ESI)  $m/z$  calcd for  $C_{13}H_{17}NO_3$  (M+Na) 258.1106; found 258.1103.

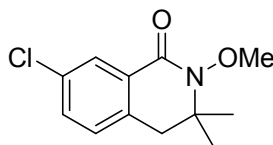

**7-Chloro-2-methoxy-3,3-dimethyl-3,4-dihydroisoquinolin-1(2H)-one (18k)**

Following the general procedure C, dihydroisoquinolinone **18k** (21 mg, 43%) was isolated as a colorless oil;  $^1H$  NMR (400 MHz,  $CDCl_3$ ):  $\delta$  8.12 (d,  $J$  = 2.2 Hz, 1H), 7.43 (dd,  $J$  = 8.1, 2.2 Hz, 1H), 7.13 (d,  $J$  = 8.1 Hz, 1H), 3.95 (s, 3H), 3.06 (s, 2H), 1.40 (s, 6H);  $^{13}C$  NMR (100 MHz,  $CDCl_3$ ):  $\delta$  163.7, 134.3, 133.2, 132.5, 129.7, 129.1, 128.1, 64.5, 62.1, 42.7, 24.8; HRMS (ESI)  $m/z$  calcd for  $C_{12}H_{14}^{35}ClNO_2$  (M+H) 240.0791; found 240.0791.



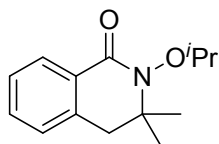

### 2-Isopropoxy-3,3-dimethyl-3,4-dihydroisoquinolin-1(2H)-one (**18l**)

Following the general procedure C, dihydroisoquinolinone **18l** (35 mg, 75%) was isolated as a white solid: Mp 44-46 °C;  $^1\text{H}$  NMR (600 MHz,  $\text{CDCl}_3$ ):  $\delta$  8.13 (d,  $J = 7.7$  Hz, 1H), 7.44 (t,  $J = 7.4$  Hz, 1H), 7.33 (t,  $J = 7.5$  Hz, 1H), 7.16 (d,  $J = 7.5$  Hz, 1H), 4.46 – 4.32 (m, 1H), 3.09 (s, 2H), 1.36 (s, 6H), 1.32 (d,  $J = 6.2$  Hz, 6H);  $^{13}\text{C}$  NMR (150 MHz,  $\text{CDCl}_3$ ):  $\delta$  167.0, 136.5, 132.3, 128.6, 128.3, 127.5, 126.9, 77.5, 62.1, 43.3, 25.2, 21.2; HRMS (ESI)  $m/z$  calcd for  $\text{C}_{14}\text{H}_{19}\text{NO}_2$  (M+H) 234.1494; found 234.1495.

### General Procedure D: Synthesis of *N*-alkoxyl dihydroisoquinolones by amide with alcohol

A solution of amide (0.2 mmol), alcohol (0.8 mmol),  $\text{Pd}(\text{OAc})_2$  (10 mol%),  $\text{K}_2\text{S}_2\text{O}_8$  (108.0 mg, 0.4 mmol) and TFA (2.0 mmol) in *c*-hex (1.0 mL) was heated in 100 °C under air for 20 min. After the reaction was completed, the reaction mixture was allowed to cool down to room temperature and saturated aqueous  $\text{NaHCO}_3$  (20 mL) was added. The resulting mixture was extracted with EtOAc (20 mL x 3). The organic layer was dried over anhydrous  $\text{Na}_2\text{SO}_4$ , filtered and the solvent was removed under reduced pressure to provide the crude product. The purification was performed by flash column chromatography on silica gel.

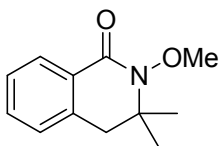

### 2-methoxy-3,3-dimethyl-3,4-dihydroisoquinolin-1(2H)-one (**18b**)

Following the general procedure C, dihydroisoquinolinone **18b** (34 mg, 84%) was isolated as a colorless oil;  $^1\text{H}$  NMR (600 MHz,  $\text{CDCl}_3$ ):  $\delta$  8.12 (d,  $J = 7.2$  Hz, 1H), 7.46 (t,  $J = 7.2$  Hz, 1H), 7.35 (t,  $J = 7.5$  Hz, 1H), 7.16 (d,  $J = 7.8$  Hz, 1H), 3.94 (s, 3H), 3.08 (s, 2H), 1.39 (s, 6H);  $^{13}\text{C}$  NMR (150 MHz,  $\text{CDCl}_3$ ):  $\delta$  165.0, 136.1, 132.6, 128.2, 127.6, 127.0, 64.5, 62.1, 43.2, 24.8; HRMS (ESI)  $m/z$  calcd for  $\text{C}_{12}\text{H}_{15}\text{NO}_2$  (M+H) 206.1181; found 206.1181.

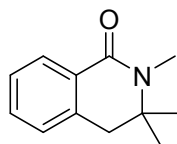**2,3,3-Trimethyl-3,4-dihydroisoquinolin-1(2H)-one (18m)**

Following the general procedure C, 2,3,3-trimethyl-3,4-dihydroisoquinolin-1(2H)-one **18m** (4 mg, 10%) was isolated as a colorless oil;  $^1\text{H}$  NMR (400 MHz,  $\text{CDCl}_3$ ):  $\delta$  7.99 (d,  $J = 7.7$  Hz, 1H), 7.34 (t,  $J = 7.4$  Hz, 1H), 7.26 (t,  $J = 7.6$  Hz, 1H), 7.07 (d,  $J = 7.4$  Hz, 1H), 3.02 (s, 3H), 2.87 (s, 2H), 1.23 (s, 6H);  $^{13}\text{C}$  NMR (100 MHz,  $\text{CDCl}_3$ ):  $\delta$  164.7, 136.1, 131.6, 128.6, 128.2, 127.2, 126.9, 55.9, 42.3, 27.1, 26.1; HRMS (ESI)  $m/z$  calcd for  $\text{C}_{12}\text{H}_{15}\text{NO}_2$  ( $\text{M}+\text{H}$ ) 190.1232; found 190.1231.

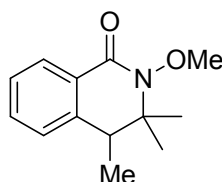**2-Methoxy-3,3,4-trimethyl-3,4-dihydroisoquinolin-1(2H)-one (18o)**

Following the general procedure D, dihydroisoquinolinone **18n** (28 mg, 63%) was isolated as a colorless oil;  $^1\text{H}$  NMR (400 MHz,  $\text{CDCl}_3$ ):  $\delta$  8.12 (d,  $J = 7.7$  Hz, 1H), 7.47 (t,  $J = 7.5$  Hz, 1H), 7.34 (t,  $J = 7.5$  Hz, 1H), 7.20 (d,  $J = 7.6$  Hz, 1H), 3.93 (s, 3H), 2.94 (q,  $J = 7.0$  Hz, 1H), 1.37 (s, 3H), 1.33 – 1.32 (m, 6H);  $^{13}\text{C}$  NMR (100 MHz,  $\text{CDCl}_3$ ):  $\delta$  164.3, 142.4, 132.7, 128.2, 127.3, 126.9, 126.8, 64.4, 64.1, 45.0, 29.7, 25.1, 21.7, 17.0; HRMS (ESI)  $m/z$  calcd for  $\text{C}_{13}\text{H}_{17}\text{NO}_2$  ( $\text{M}+\text{Na}$ ) 242.1157; found 220.1132.

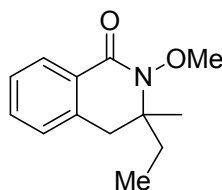**3-Ethyl-2-methoxy-3-methyl-3,4-dihydroisoquinolin-1(2H)-one (18o')**

Following the general procedure D, dihydroisoquinolinone **18n'** (3.4 mg, 8%) was isolated as a colorless oil;  $^1\text{H}$  NMR (400 MHz,  $\text{CDCl}_3$ ):  $\delta$  8.12 (d,  $J = 7.6$  Hz, 1H), 7.44 (t,  $J = 7.0$  Hz, 1H), 7.34 (t,  $J = 7.5$  Hz, 1H), 7.15 (d,  $J = 7.4$  Hz, 1H), 3.94 (s, 2H), 3.06 (s, 2H), 1.87 (m, 1H), 1.66 (m, 1H), 1.40 (s, 3H), 0.90 (t,  $J = 7.5$  Hz, 3H);  $^{13}\text{C}$  NMR (100 MHz,  $\text{CDCl}_3$ ):  $\delta$  164.7, 136.0, 132.4, 128.4, 128.1, 127.5, 126.9, 65.0,

64.4, 40.0, 29.7, 22.5, 9.1; HRMS (ESI)  $m/z$  calcd for  $C_{13}H_{17}NO_2$  ( $M+Na$ ) 242.1157; found 220.1132.

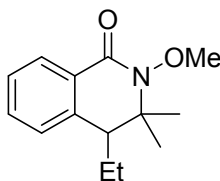

#### 4-Ethyl-2-methoxy-3,3-dimethyl-3,4-dihydroisoquinolin-1(2H)-one (18p)

Following the general procedure D, dihydroisoquinolinone **18o** (13.5 mg, 29%) was isolated as a colorless oil;  $^1H$  NMR (400 MHz,  $CDCl_3$ ):  $\delta$  8.12 (d,  $J = 7.7$  Hz, 1H), 7.44 (td,  $J = 7.5, 1.4$  Hz, 1H), 7.35 (td,  $J = 7.6, 1.1$  Hz, 1H), 7.11 (d,  $J = 7.5$  Hz, 1H), 3.94 (s, 3H), 2.55 (dd,  $J = 9.8, 4.0$  Hz, 1H), 1.95 (dtd,  $J = 15.0, 7.5, 3.4$  Hz, 1H), 1.66 – 1.56 (m, 1H), 1.51 (s, 3H), 1.21 (s, 3H), 0.80 (t,  $J = 7.5$  Hz, 3H);  $^{13}C$  NMR (100 MHz,  $CDCl_3$ ):  $\delta$  163.9, 140.2, 131.6, 128.8, 128.3, 127.7, 126.9, 64.2, 64.1, 51.9, 25.7, 23.6, 22.8, 11.8; HRMS (ESI)  $m/z$  calcd for  $C_{14}H_{19}NO_2$  ( $M+H$ ) 234.1494; found 234.1495.

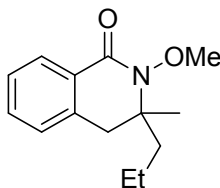

#### 2-Methoxy-3-methyl-3-propyl-3,4-dihydroisoquinolin-1(2H)-one (18p')

Following the general procedure D, dihydroisoquinolinone **18o'** (15 mg, 33%) was isolated as a colorless oil;  $^1H$  NMR (400 MHz,  $CDCl_3$ ):  $\delta$  8.12 (d,  $J = 7.7$  Hz, 1H), 7.44 (t,  $J = 7.4$  Hz, 1H), 7.34 (t,  $J = 7.6$  Hz, 1H), 7.14 (d,  $J = 7.5$  Hz, 1H), 3.94 (s, 3H), 3.07 (s, 2H), 1.83 – 1.72 (m, 1H), 1.63 – 1.52 (m, 1H), 1.42 (s, 3H), 1.31 (m, 2H), 0.86 (t,  $J = 7.3$  Hz, 3H);  $^{13}C$  NMR (100 MHz,  $CDCl_3$ ):  $\delta$  164.7, 136.0, 132.4, 128.4, 128.1, 127.4, 126.9, 64.7, 64.3, 40.7, 39.8, 23.3, 17.9, 14.5; HRMS (ESI)  $m/z$  calcd for  $C_{14}H_{19}NO_2$  ( $M+H$ ) 234.1494; found 234.1495.

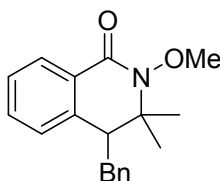

#### 4-benzyl-2-methoxy-3,3-dimethyl-3,4-dihydroisoquinolin-1(2H)-one (18q)

Following the general procedure D, dihydroisoquinolinone **18p** (18 mg, 30%) was isolated as a colorless oil;  $^1\text{H}$  NMR (400 MHz,  $\text{CDCl}_3$ ):  $\delta$  8.12 (d,  $J = 6.9$  Hz, 1H), 7.26 (t, 1H), 7.19 – 7.13 (m, 3H), 7.08 (td,  $J = 7.5, 1.3$  Hz, 1H), 6.77 (m, 2H), 6.21 (d,  $J = 7.5$  Hz, 1H), 3.99 (s, 3H), 3.35 (dd,  $J = 12.9, 4.0$  Hz, 1H), 2.86 (dd,  $J = 10.9, 4.1$  Hz, 1H), 2.67 (dd,  $J = 12.8, 11.1$  Hz, 1H), 1.65 (s, 3H), 1.25 (s, 3H);  $^{13}\text{C}$  NMR (100 MHz,  $\text{CDCl}_3$ ):  $\delta$  164.1, 139.4, 139.2, 131.2, 129.6, 129.0, 128.2, 128.1, 127.3, 127.0, 126.2, 64.2, 53.0, 37.5, 29.7, 25.5, 23.4; HRMS (ESI)  $m/z$  calcd for  $\text{C}_{19}\text{H}_{21}\text{NO}_2$  (M+H) 296.1651; found 296.1651.

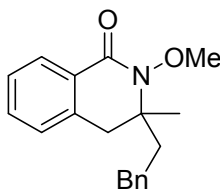

**2-methoxy-3-methyl-3-phenethyl-3,4-dihydroisoquinolin-1(2H)-one (18q')**

Following the general procedure D, dihydroisoquinolinone **18p'** (20 mg, 34%) was isolated as a colorless oil;  $^1\text{H}$  NMR (400 MHz,  $\text{CDCl}_3$ ):  $\delta$  8.12 (d,  $J = 7.7$  Hz, 1H), 7.44 (t,  $J = 6.9$  Hz, 1H), 7.35 (t,  $J = 7.4$  Hz, 1H), 7.23 (d,  $J = 7.5$  Hz, 2H), 7.19–7.07 (m, 4H), 3.97 (s, 3H), 3.13 (d,  $J = 5.2$  Hz, 2H), 2.67–2.63 (t,  $J = 8.8$  Hz, 2H), 2.16 – 2.09 (m, 1H), 1.9 – 1.87 (m, 1H), 1.52 (s, 3H);  $^{13}\text{C}$  NMR (100 MHz,  $\text{CDCl}_3$ ):  $\delta$  164.6, 141.5, 135.8, 132.5, 128.4, 128.3, 128.2 (1), 128.2 (0), 127.5, 127.0, 126.0, 64.6, 64.5, 41.0, 39.3, 31.1, 23.3.; HRMS (ESI)  $m/z$  calcd for  $\text{C}_{19}\text{H}_{21}\text{NO}_2$  (M+H) 296.1651; found 296.1651.

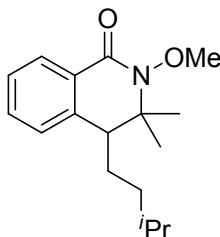

**4-isopentyl-2-methoxy-3,3-dimethyl-3,4-dihydroisoquinolin-1(2H)-one (18r)**

Following the general procedure D, dihydroisoquinolinone **18q** (17.6 mg, 32%) was isolated as a colorless oil;  $^1\text{H}$  NMR (400 MHz,  $\text{CDCl}_3$ ):  $\delta$  8.11 (d,  $J = 7.5$  Hz, 1H), 7.43 (dd,  $J = 7.5, 4.2$  Hz, 1H), 7.34 (t,  $J = 7.5$  Hz, 1H), 7.10 (d,  $J = 7.5$  Hz, 1H), 3.95 (s, 3H), 2.59 (dd,  $J = 10.0, 4.0$  Hz, 1H), 1.91–1.83 (m, 1H), 1.59–1.55 (m, 1H), 1.50 (s, 3H), 1.21 (s, 3H), 1.14–0.96 (m, 3H), 0.84 (d,  $J = 7.0$  Hz, 3H), 0.79 (d,  $J = 7.0$  Hz,

3H);  $^{13}\text{C}$  NMR (100 MHz,  $\text{CDCl}_3$ ):  $\delta$  163.9, 140.8, 131.7, 128.5, 128.4, 127.6, 126.9, 64.3, 64.1, 50.8, 36.4, 28.6, 28.2, 25.7, 22.8, 22.3; HRMS (ESI)  $m/z$  calcd for  $\text{C}_{17}\text{H}_{25}\text{NO}_2$  ( $\text{M}+\text{Na}$ ) 298.1783; found 298.1780.

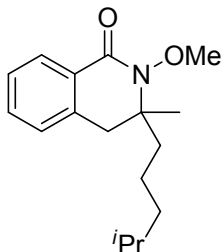

**2-methoxy-3-methyl-3-(4-methylpentyl)-3,4-dihydroisoquinolin-1(2H)-one (18r')**

Following the general procedure D, dihydroisoquinolinone **18q'** (17.1 mg, 31%) was isolated as a colorless oil;  $^1\text{H}$  NMR (400 MHz,  $\text{CDCl}_3$ ):  $\delta$  8.11 (d,  $J = 7.5$  Hz, 1H), 7.44 (t,  $J = 7.5$  Hz, 1H), 7.34 (t,  $J = 7.5$  Hz, 1H), 7.14 (d,  $J = 7.5$  Hz, 1H), 3.94 (s, 3H), 3.07 (s, 2H), 1.84–1.74(m, 2H), 1.51–1.45 (m, 2H), 1.41 (s, 3H), 1.12–1.10 (m, 2H), 0.82 (dd,  $J = 7.0, 4.0$  Hz, 6H), 0.67 (dd,  $J = 7.0, 4.0$  Hz, 1H);  $^{13}\text{C}$  NMR (100 MHz,  $\text{CDCl}_3$ ):  $\delta$  164.7, 136.0, 132.4, 128.4, 128.1, 127.4, 126.9, 64.8, 64.3, 40.6, 39.3, 37.6, 27.8, 23.1, 22.5, 22.3; HRMS (ESI)  $m/z$  calcd for  $\text{C}_{17}\text{H}_{25}\text{NO}_2$  ( $\text{M}+\text{Na}$ ) 298.1783; found 298.1784.

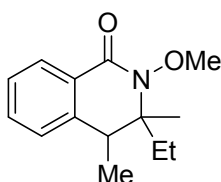

**3-ethyl-2-methoxy-3,4-dimethyl-3,4-dihydroisoquinolin-1(2H)-one (18s)**

Following the general procedure D, dihydroisoquinolinone **18r** (30.8 mg, 66%) was isolated as a colorless oil;  $^1\text{H}$  NMR (400 MHz,  $\text{CDCl}_3$ ):  $\delta$  8.10 (dd,  $J = 7.5, 4.0$  Hz, 1H), 7.45 (td,  $J = 7.5, 1.4$  Hz, 1H), 7.3–7.29 (m, 1H), 7.17 (dd,  $J = 7.5, 4.0$  Hz, 1H), 3.93 (s, 3H), 3.00 (q,  $J = 7.0$  Hz, 1H), 2.00–1.93 (m, 1H), 1.84–1.75 (m, 1H), 1.29 (dd,  $J = 7.0, 1.5$  Hz, 6H), 0.86 (t,  $J = 7.0$  Hz, 3H);  $^{13}\text{C}$  NMR (100 MHz,  $\text{CDCl}_3$ ):  $\delta$  163.6, 142.7, 132.6 (d,  $J = 3.8$  Hz), 128.1 (d,  $J = 7.1$  Hz), 127.4, 127.2, 126.8 (d,  $J = 4.0$  Hz), 67.1, 64.2, 63.7, 41.8, 31.6, 22.7, 14.1; HRMS (ESI)  $m/z$  calcd for  $\text{C}_{14}\text{H}_{19}\text{NO}_2$  ( $\text{M}+\text{H}$ ) 234.1494; found 234.1495.

**The reaction of benzamide 17b with alkene**

A mixture of *N*-methoxybenzamide (**17b**) (30.2 mg, 0.2 mmol), 2-methylbut-2-ene (0.8 mmol), Pd(OAc)<sub>2</sub> (10 mol%), K<sub>2</sub>S<sub>2</sub>O<sub>8</sub> (108.0 mg, 0.4 mmol) and TFA (228.0 mg, 2.0 mmol) in *c*-hex (1.0 mL) was heated at 100 °C for 60 min. The reaction mixture was allowed to cool down to room temperature and saturated aqueous NaHCO<sub>3</sub> (20 mL) was added. The resulting mixture was extracted with EtOAc (20 mL x 3). The organic layer was dried over anhydrous Na<sub>2</sub>SO<sub>4</sub>, filtered and the solvent was removed under reduced pressure to provide the crude product. The purification was performed by flash column chromatography on silica gel to give the unreacted benzamide **17b** (28.4 mg, 94%).

**Radical capture experiment with 2,6-di-*tert*-butyl phenol**

A solution of *N*-methoxybenzamide (**17b**) (30.2 mg, 0.2 mmol), DTBP (116.8 mg, 0.8 mmol), Pd(OAc)<sub>2</sub> (4.5 mg, 10 mol%) and TFA (684.0 mg, 6.0 mmol) in *c*-hex (1.0 mL) was added 2,6-di-*tert*-butyl phenol (329.6 mg, 1.6 mmol). The mixture was heated at 100 °C under air for 60 min. The reaction mixture was allowed to cool down to room temperature and saturated aqueous NaHCO<sub>3</sub> (20 mL) was added. The resulting mixture was extracted with EtOAc (20 mL x 3). The organic layer was dried over anhydrous Na<sub>2</sub>SO<sub>4</sub>, filtered and the solvent was removed under reduced pressure to provide the crude product. The purification was performed by flash column chromatography on silica gel to give the unreacted benzamide **17b** (28.7 mg, 95%).

**Radical capture experiment with TEMPO**

A solution of *N*-methoxybenzamide (**17b**) (30.2 mg, 0.2 mmol), DTBP (116.8 mg, 0.8 mmol), Pd(OAc)<sub>2</sub> (4.5 mg, 10 mol%) and TFA (684.0 mg, 6.0 mmol) in *c*-hex (1.0 mL) was added TEMPO (329.6 mg, 1.6 mmol). The mixture was heated in 100 °C under air for 60 min. The reaction mixture was allowed to cool down to room temperature and saturated aqueous NaHCO<sub>3</sub> (20 mL) was added. The resulting mixture was extracted with EtOAc (20 mL x 3). The organic layer was dried over

anhydrous Na<sub>2</sub>SO<sub>4</sub>, filtered and the solvent was removed under reduced pressure to provide the crude product. The purification was performed by flash column chromatography on silica gel to give the unreacted benzamide **17b** (27.8 mg, 92%).

#### Control experiment with palladacycle **19**

A mixture of palladacycle **19** (51.0 mg, 0.2 mmol), DTBP (116.8 mg, 0.8 mmol) and TFA (684.0 mg, 6.0 mmol) in *c*-hex (1.0 mL) was heated at 100 °C for 60 min. The reaction mixture was allowed to cool down to room temperature and saturated aqueous NaHCO<sub>3</sub> (20 mL) was added. The resulting mixture was extracted with EtOAc (20 mL x 3). The organic layer was dried over anhydrous Na<sub>2</sub>SO<sub>4</sub>, filtered and the solvent was removed under reduced pressure to provide the crude product. The purification was performed by flash column chromatography on silica gel to give dihydroisoquinolinone **18b** (39.8 mg, 97%).

#### Intermolecular competition experiment between benzamides **17b** and **17b-5D**

A mixture of *N*-methoxybenzamide (**17b**) (15.1 mg, 0.1 mmol), *N*-methoxy-1,2,3,4,5,6-pentadeuteriobenzamide (**17b-5D**) (15.6 mg, 0.1 mmol), *t*-BuOH (59.2 mg, 0.8 mmol), Pd(OAc)<sub>2</sub> (4.5 mg, 10 mol%), K<sub>2</sub>S<sub>2</sub>O<sub>8</sub> (108.0 mg, 0.4 mmol) and TFA (684.0 mg, 6.0 mmol) in *c*-hex (1.0 mL) was heated at 100 °C for 10 min. The reaction mixture was allowed to cool down to room temperature and saturated aqueous NaHCO<sub>3</sub> (20 mL) was added. The resulting mixture was extracted with EtOAc (20 mL x 3). The organic layer was dried over anhydrous Na<sub>2</sub>SO<sub>4</sub>, filtered and the solvent was removed under reduced pressure to provide the crude product. The purification was performed by flash column chromatography on silica gel to give **18b/18b-5D** (21.4 mg, 42%). The ratio of dihydroisoquinolinones **18b:18b-5D** in the crude mixture of products was determined by <sup>1</sup>H-NMR. The kinetic isotopic effect of this reaction was thus determined to be  $kH/kD = 1.9$ .

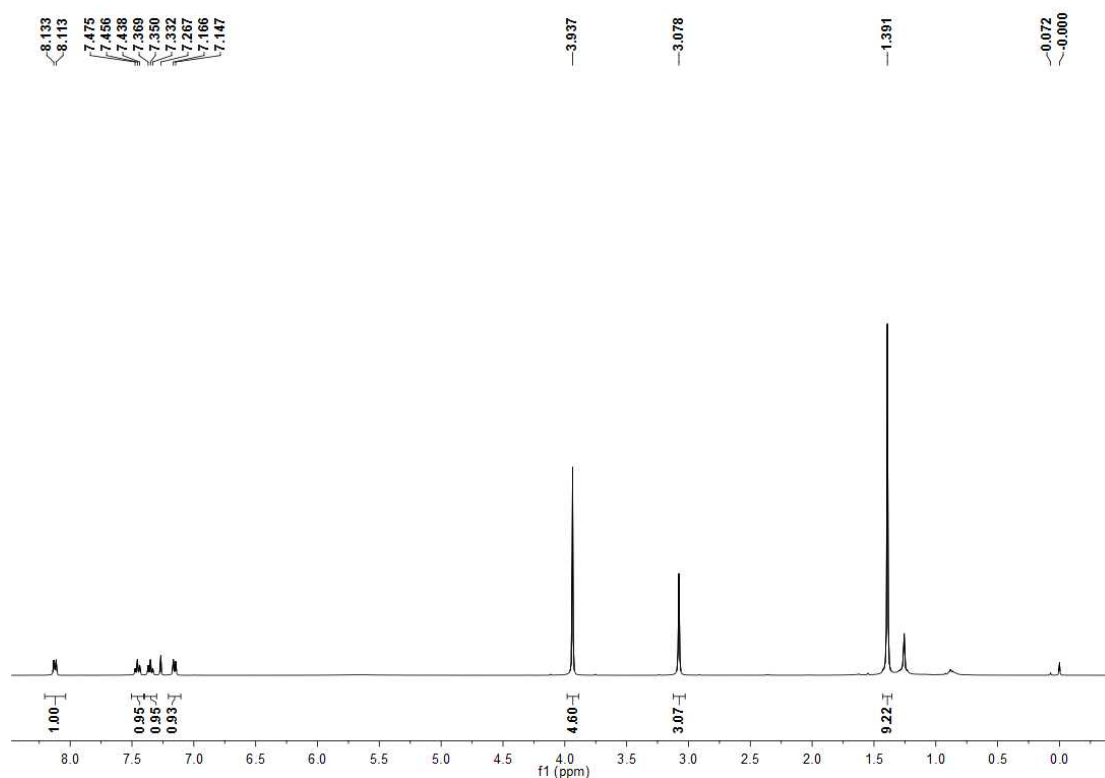

### Intramolecular competition experiment with tertiary alcohol **6a-D6**

A mixture of *N*-methoxybenzamide (**17b**) (30.2 mg, 0.2 mmol), *t*-BuOH-**D6** (**[D6]-6a**) (59.2 mg, 0.8 mmol), Pd(OAc)<sub>2</sub> (4.5 mg, 10 mol%), K<sub>2</sub>S<sub>2</sub>O<sub>8</sub> (108.0 mg, 0.4 mmol) and TFA (684.0 mg, 6.0 mmol) in *c*-hex (1.0 mL) was heated at 100 °C for 15 min. The reaction mixture was allowed to cool down to room temperature and saturated aqueous NaHCO<sub>3</sub> (20 mL) was added. The resulting mixture was extracted with EtOAc (20 mL x 3). The organic layer was dried over anhydrous Na<sub>2</sub>SO<sub>4</sub>, filtered and the solvent was removed under reduced pressure to provide the crude product. The purification was performed by flash column chromatography on silica gel to give **18b-D6/18b-D5** (24.0 mg, 57%). The ratio of dihydroisoquinolinones **18b-D6:18b-D5** in the crude mixture of products was determined by <sup>1</sup>H-NMR. The kinetic isotopic effect of this reaction was thus determined to be  $kH/kD = 4.7$ .



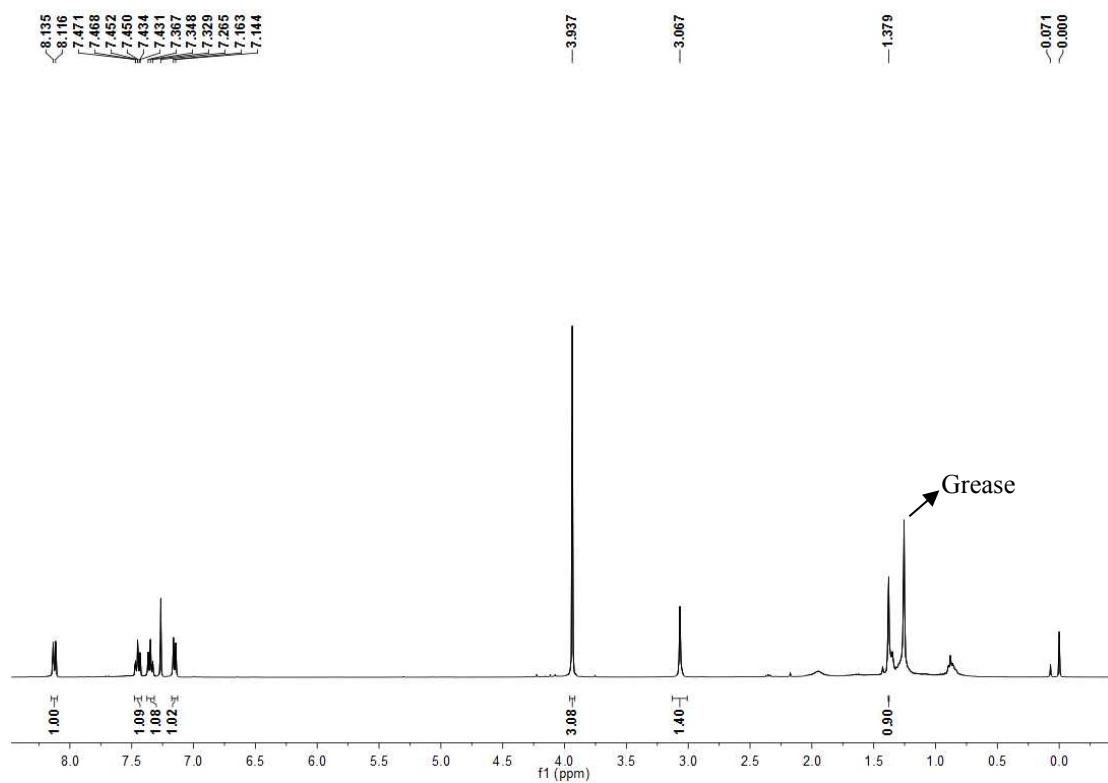

H/D exchange experiments:

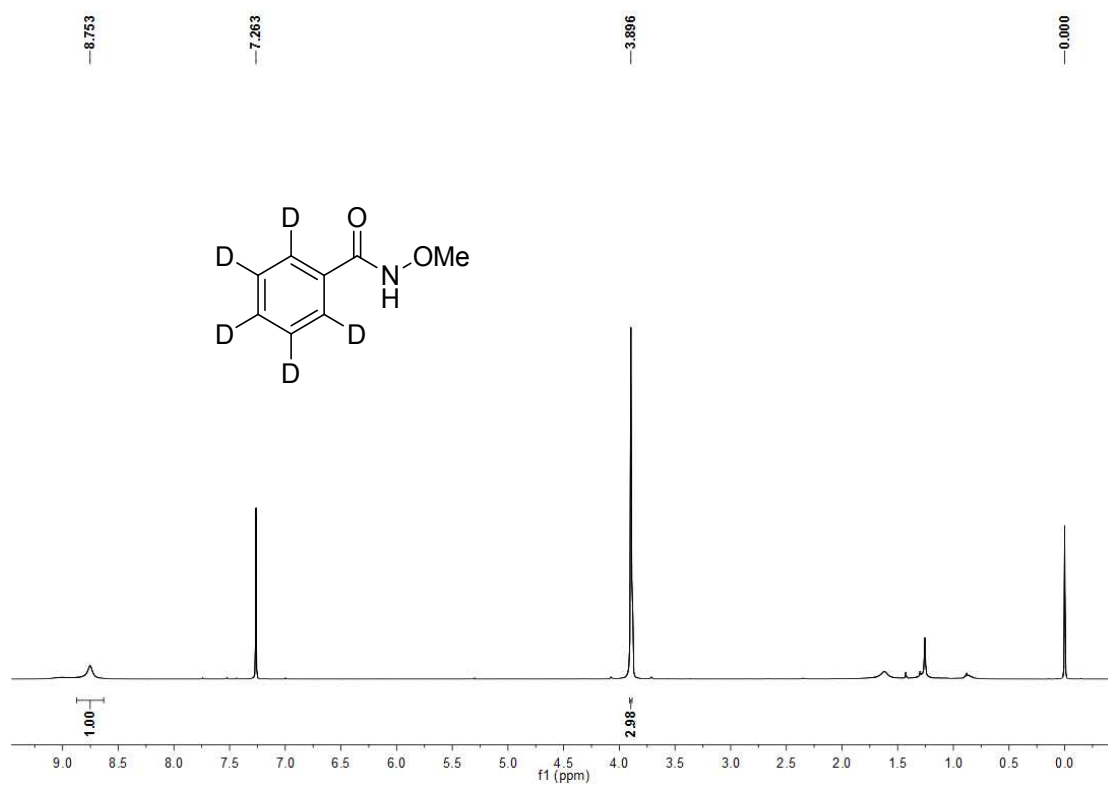

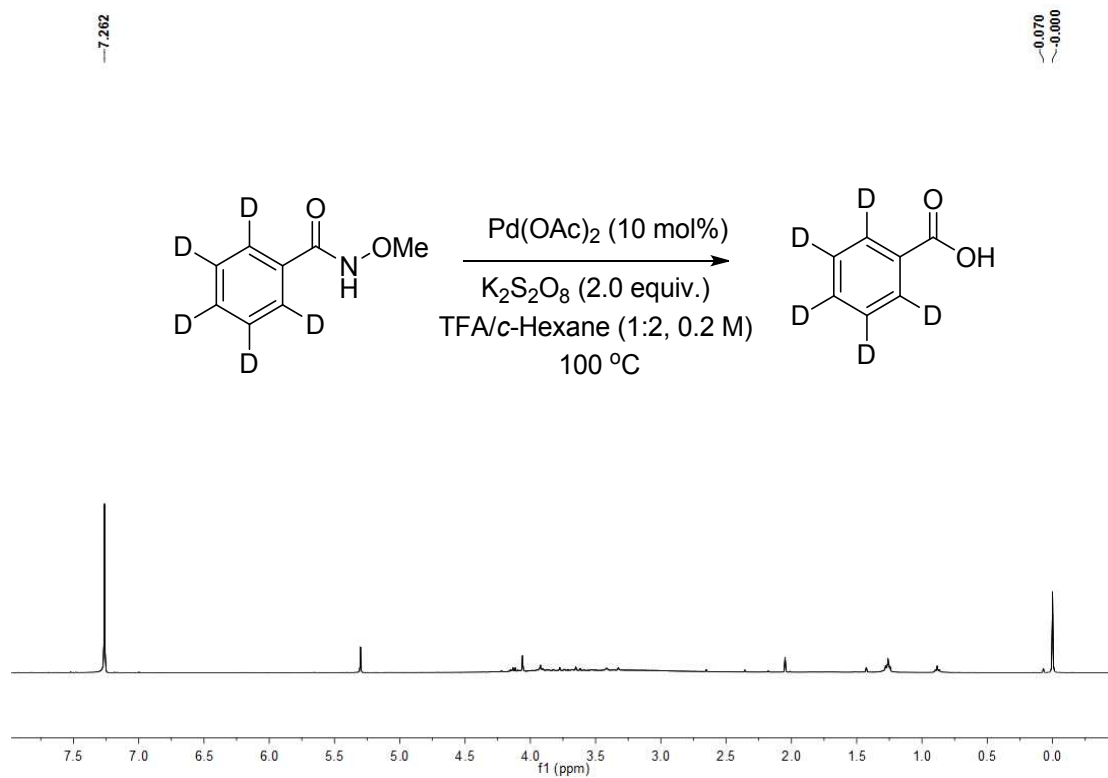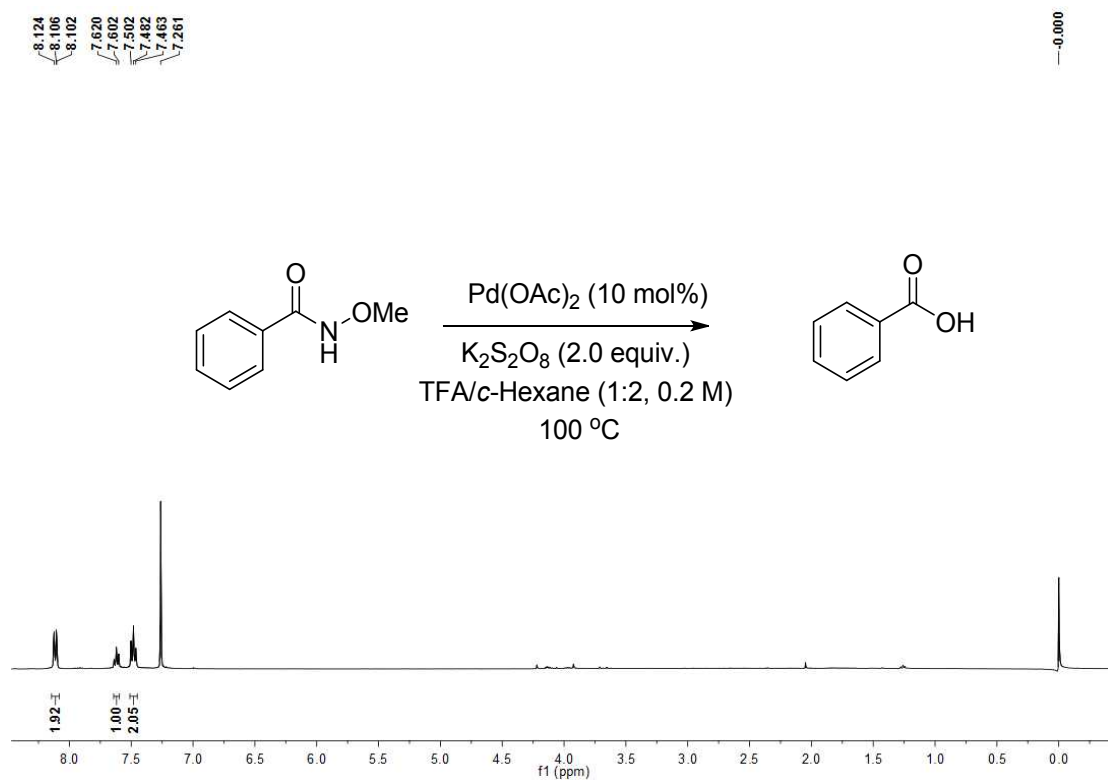

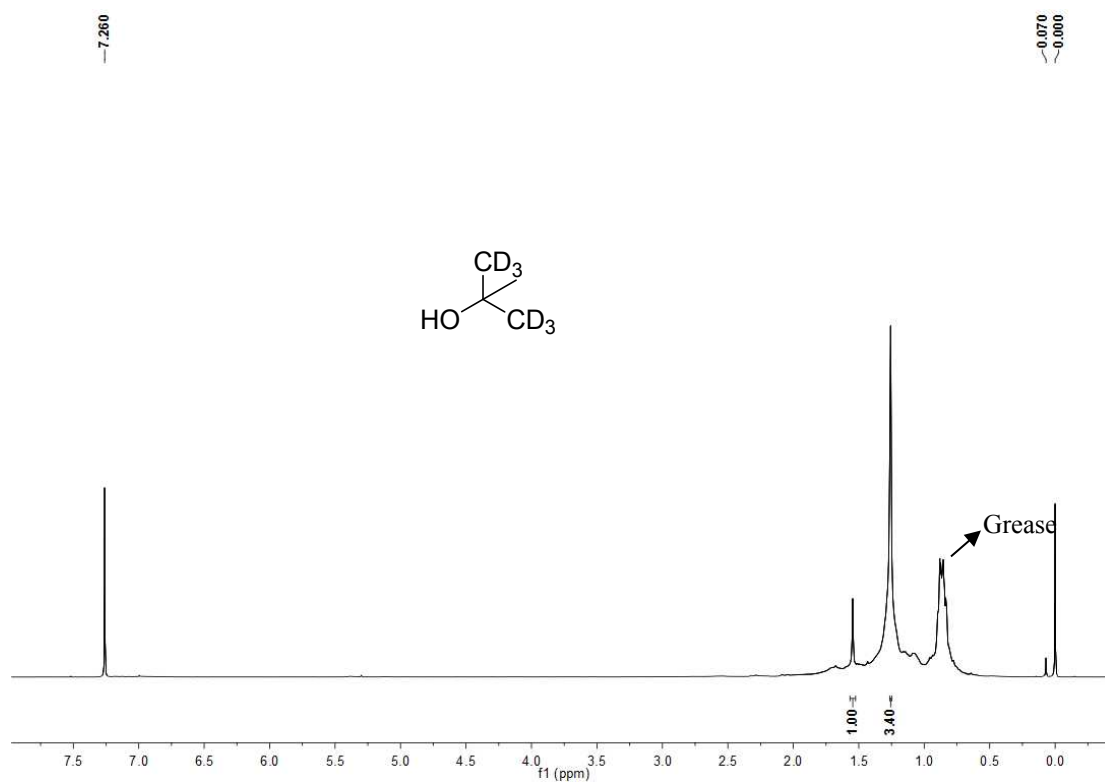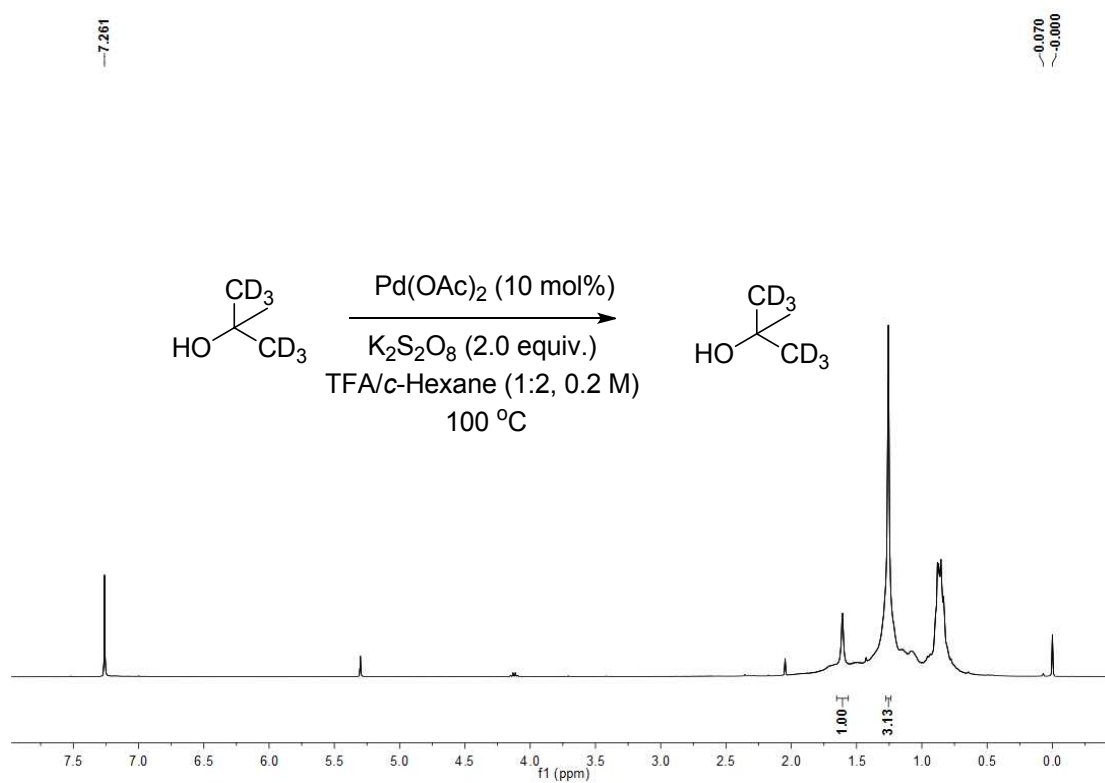

## References:

1. N. Guimond, C. Gouliaras and K. Fagnou, *J. Am. Chem. Soc.*, 2010, **132**, 6908.
2. Z. W. Chen, Y. Z. Zhu and J. Yu. Zheng, *J. Org. Chem.*, **2014**, *79*, 10988–10998.

3. Semenov, *et al*, *Zhurnal Organicheskoi Khimii*, **1979**, *15*, 2069.
4. T. Kukosha, N. Trufilkina and M. Katkevics, *et al*, *Synthesis*, **2012**, *44*, 2413–2423.
5. H. B. Zhong, D. Yang, S. Q. Wang and J. H. Huang, *Chem. Commun.*, **2012**, *48*, 3236.
6. N. N. Zhang, B. Y. Li, H. B. Zhong and J. H. Huang, *Org. Biomol. Chem.*, **2012**, *10*, 9429.

**$^1\text{H}$  and  $^{13}\text{C}$  NMR Spectra**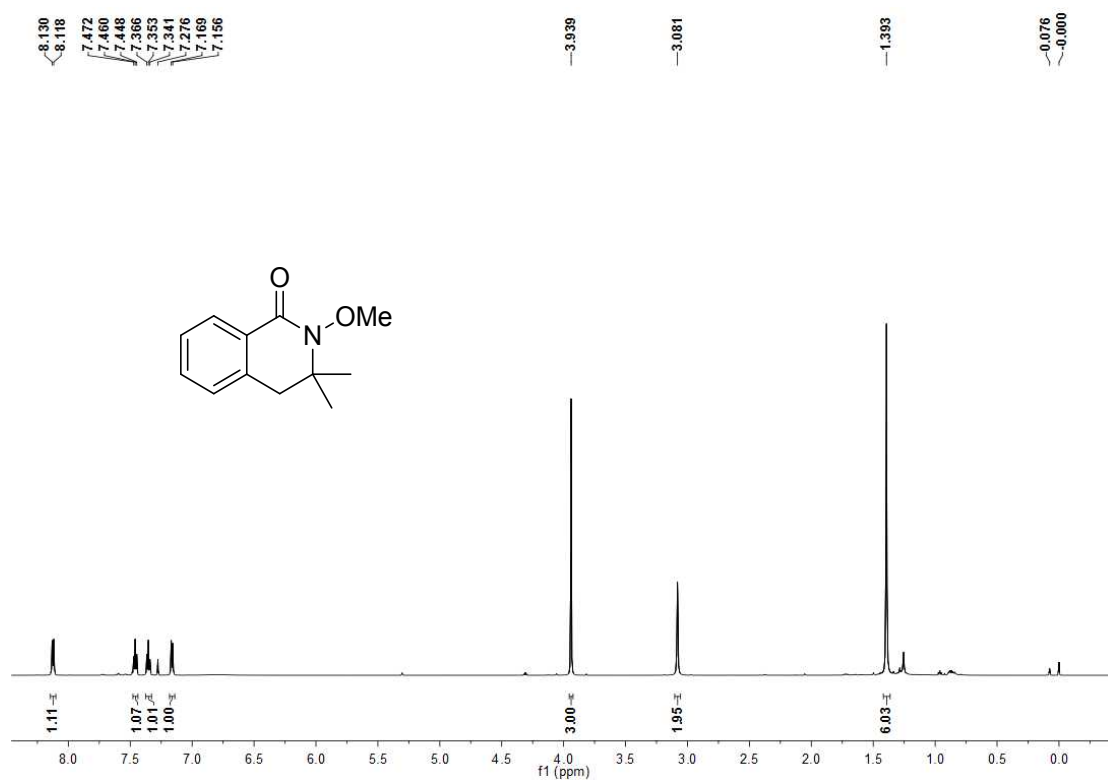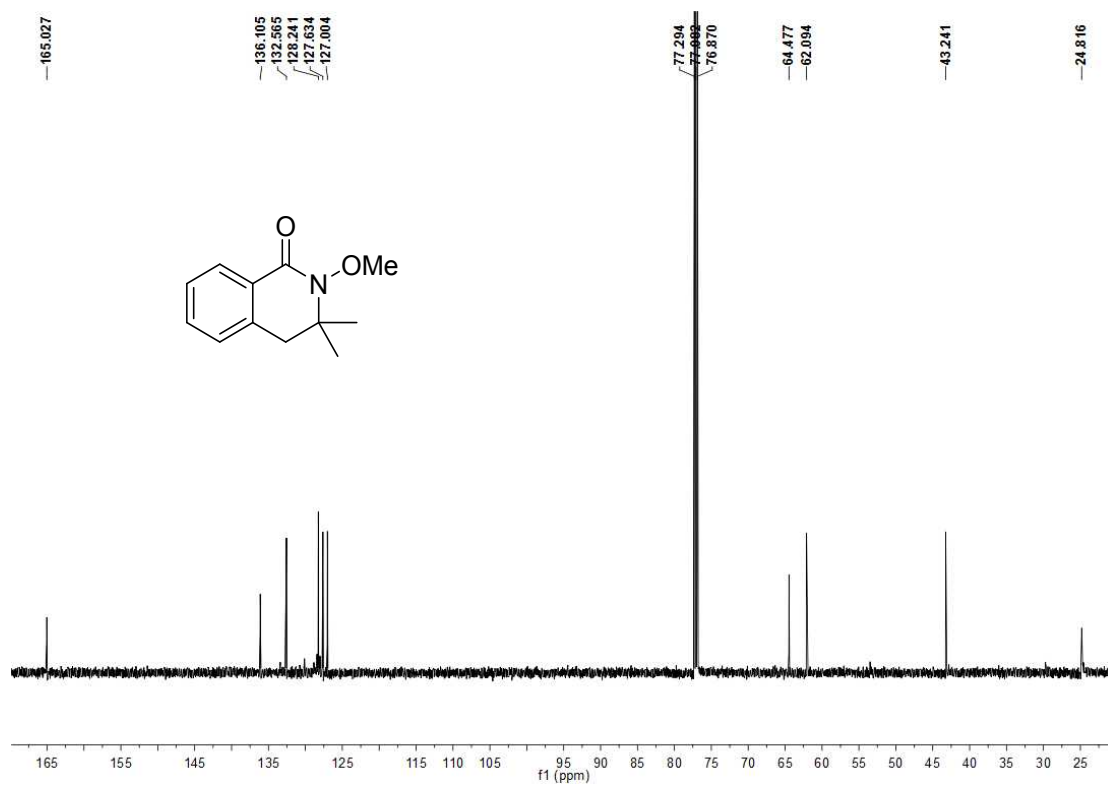

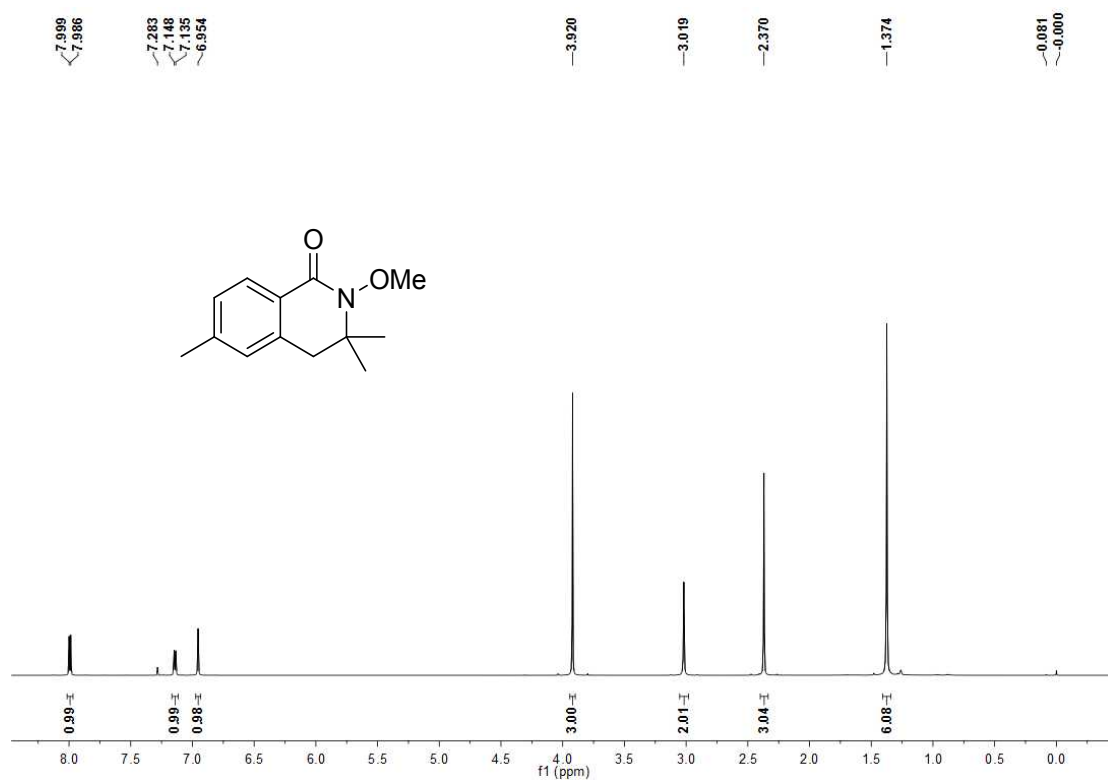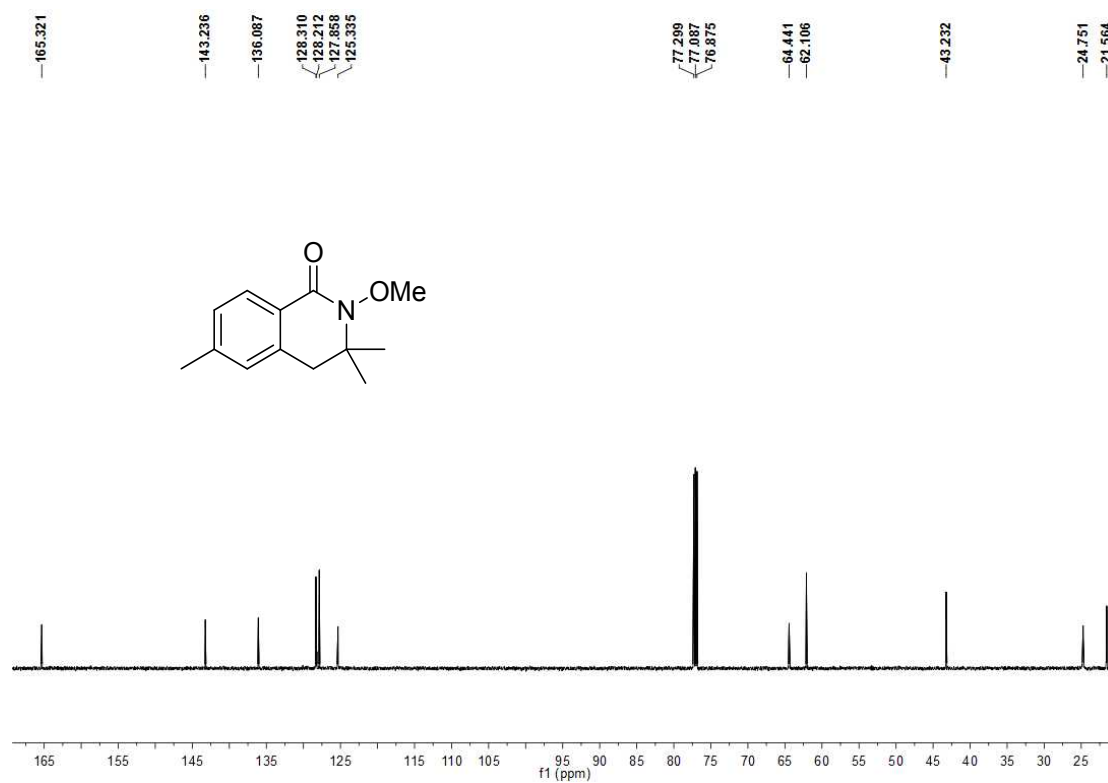

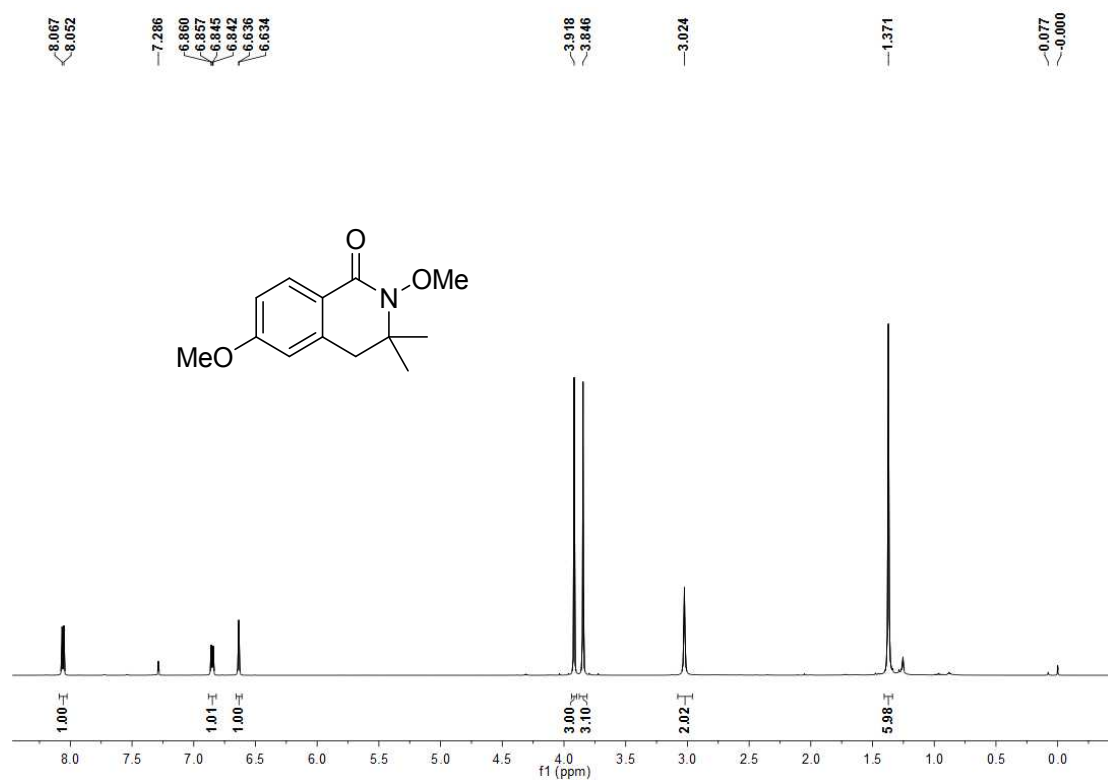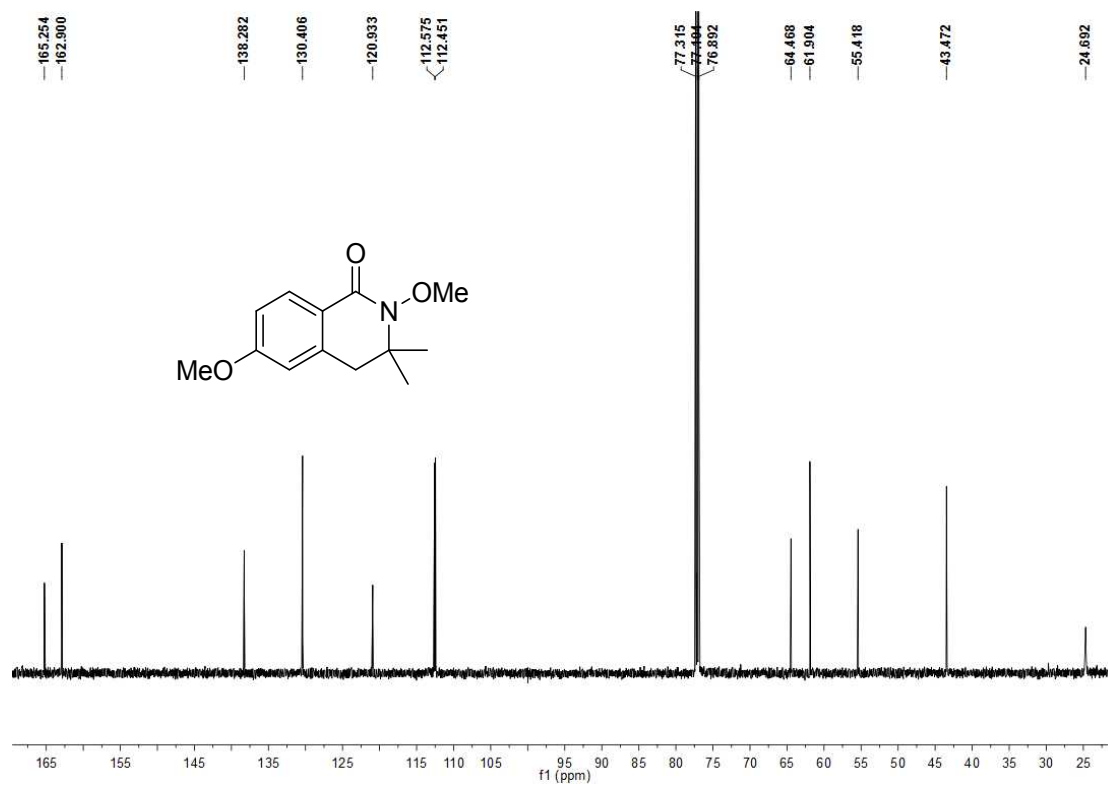

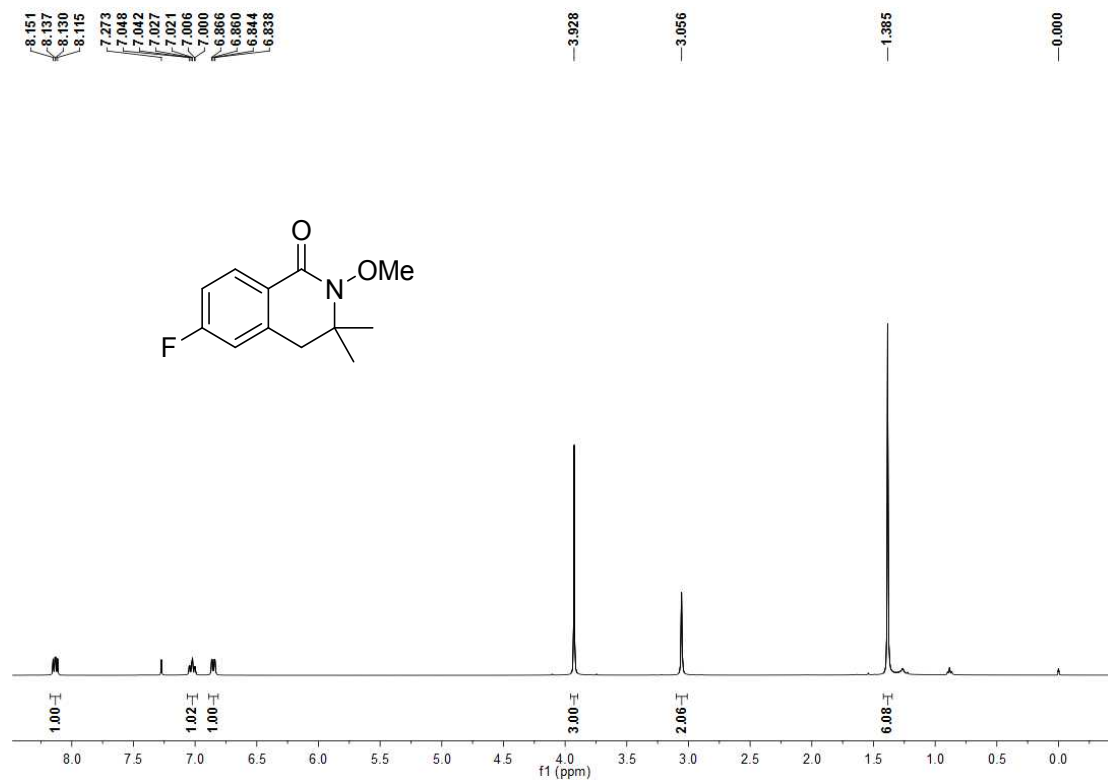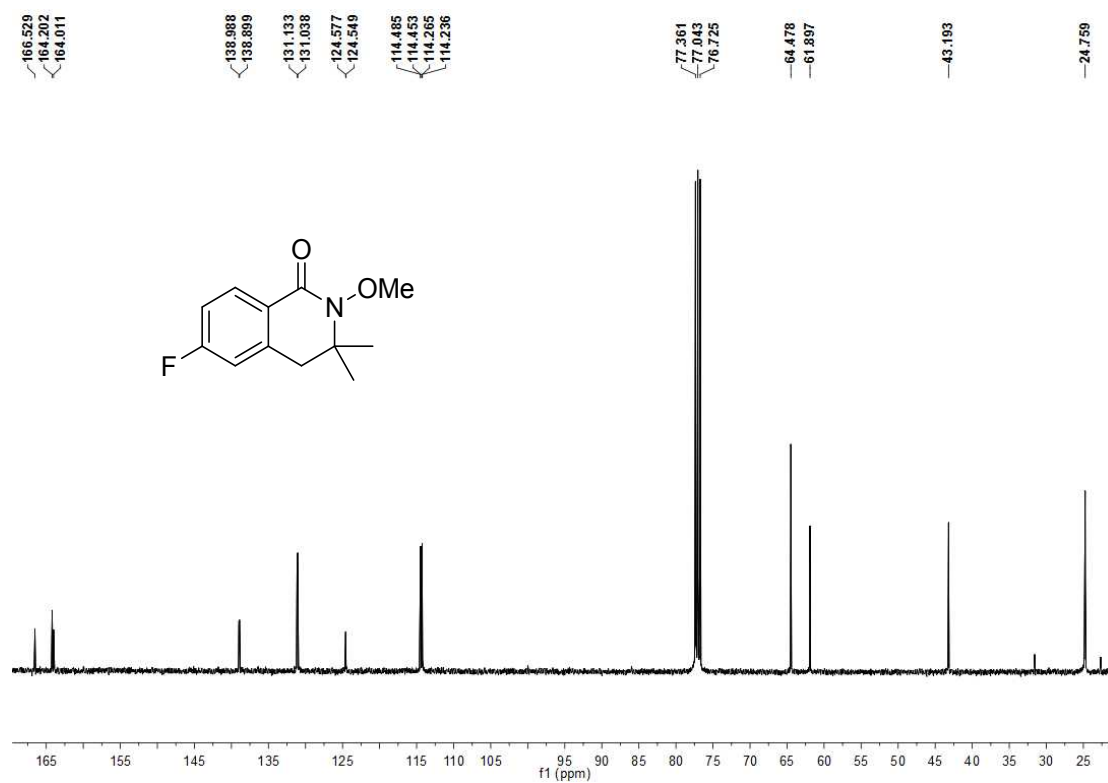



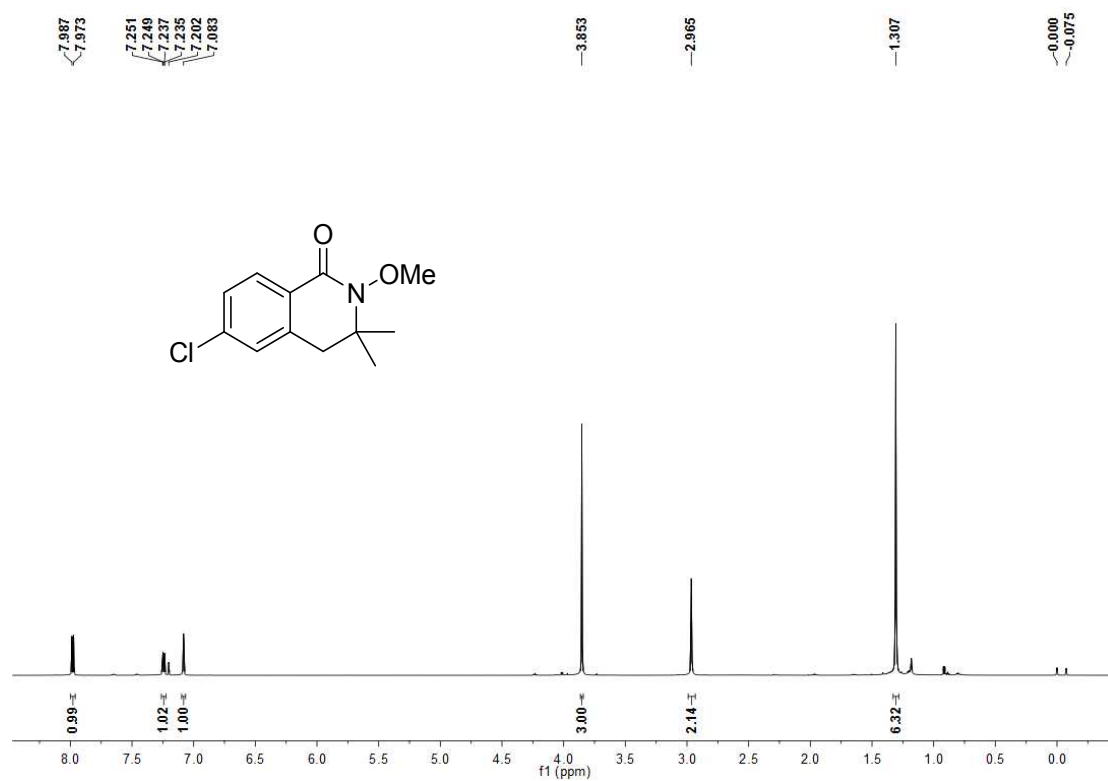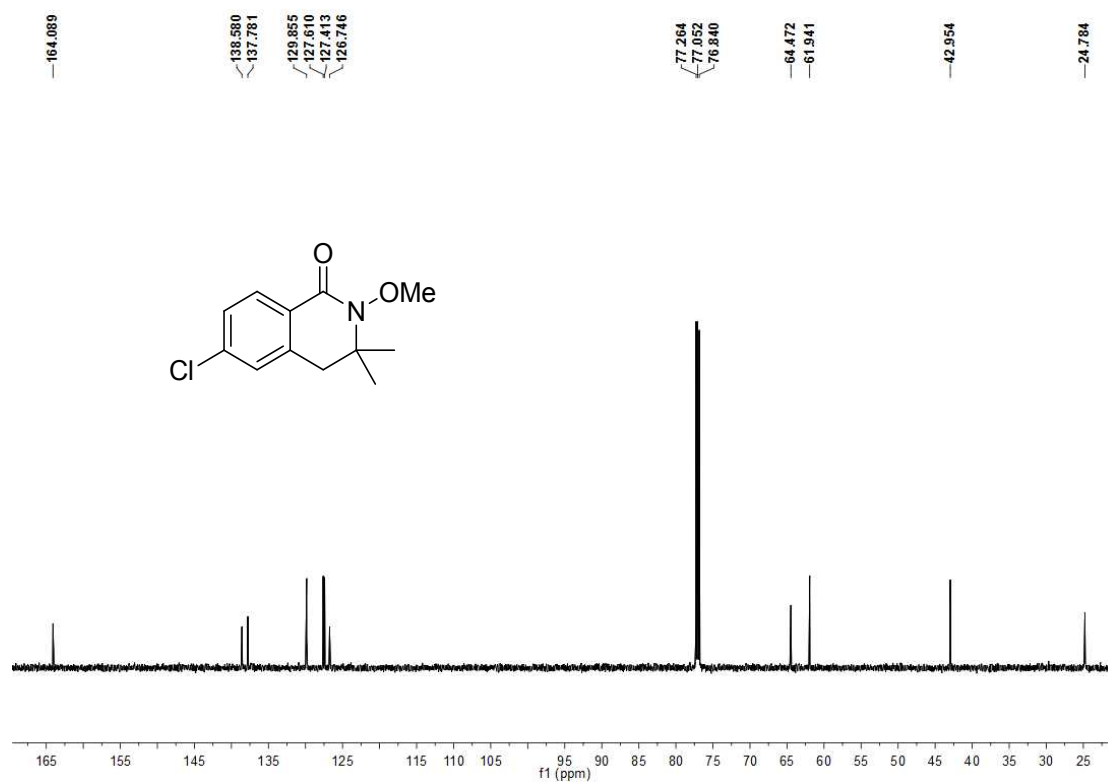

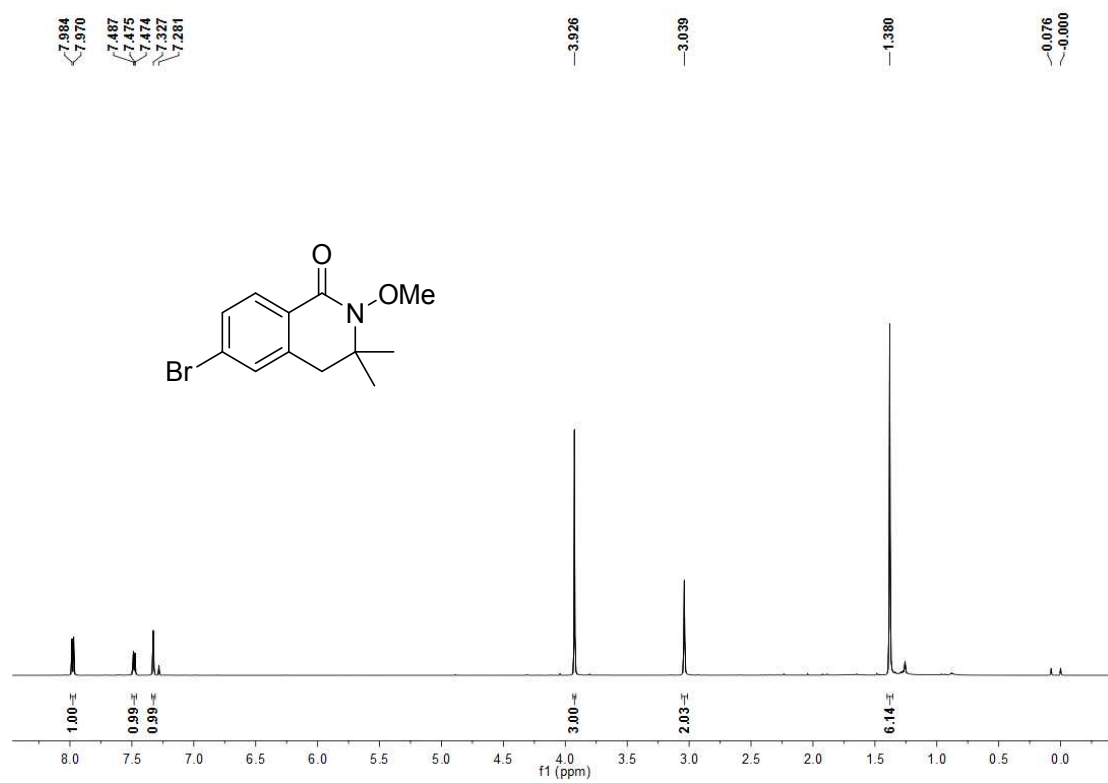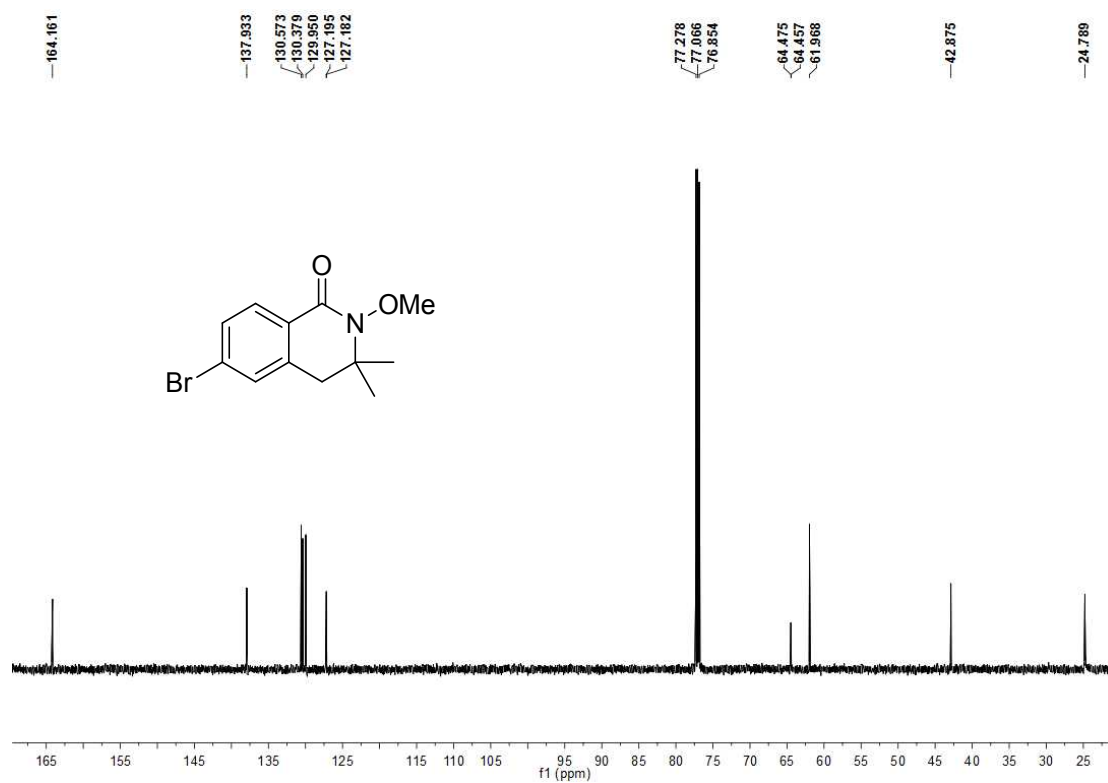

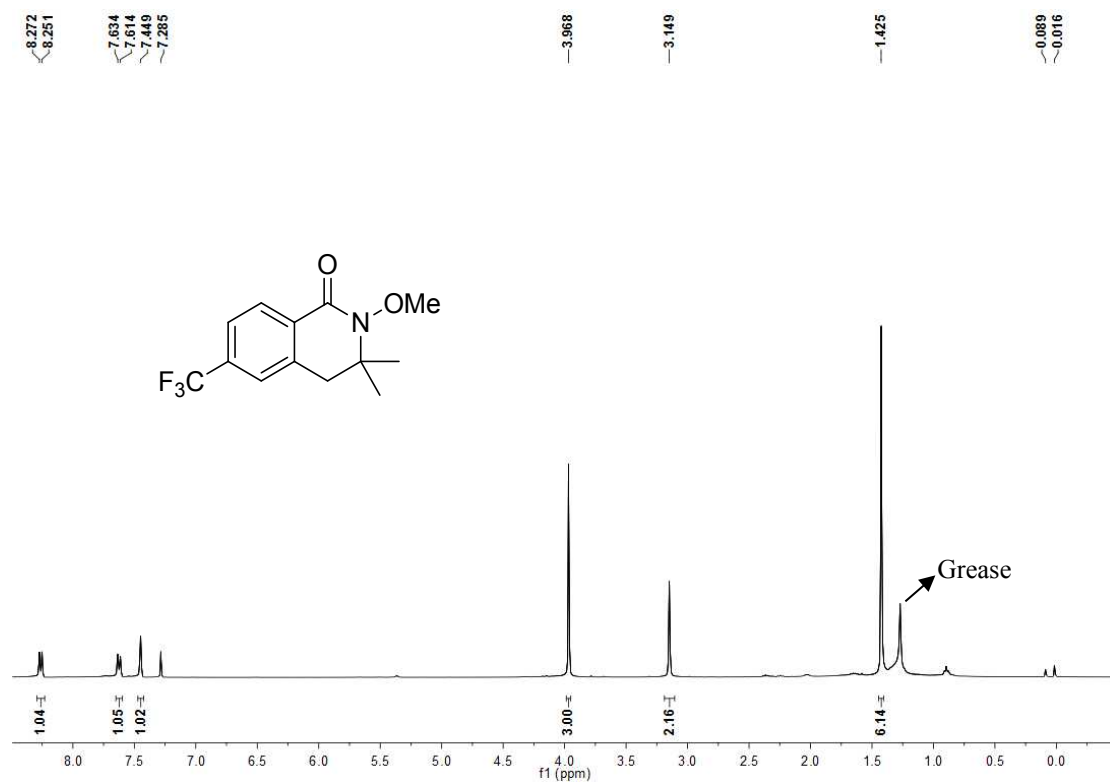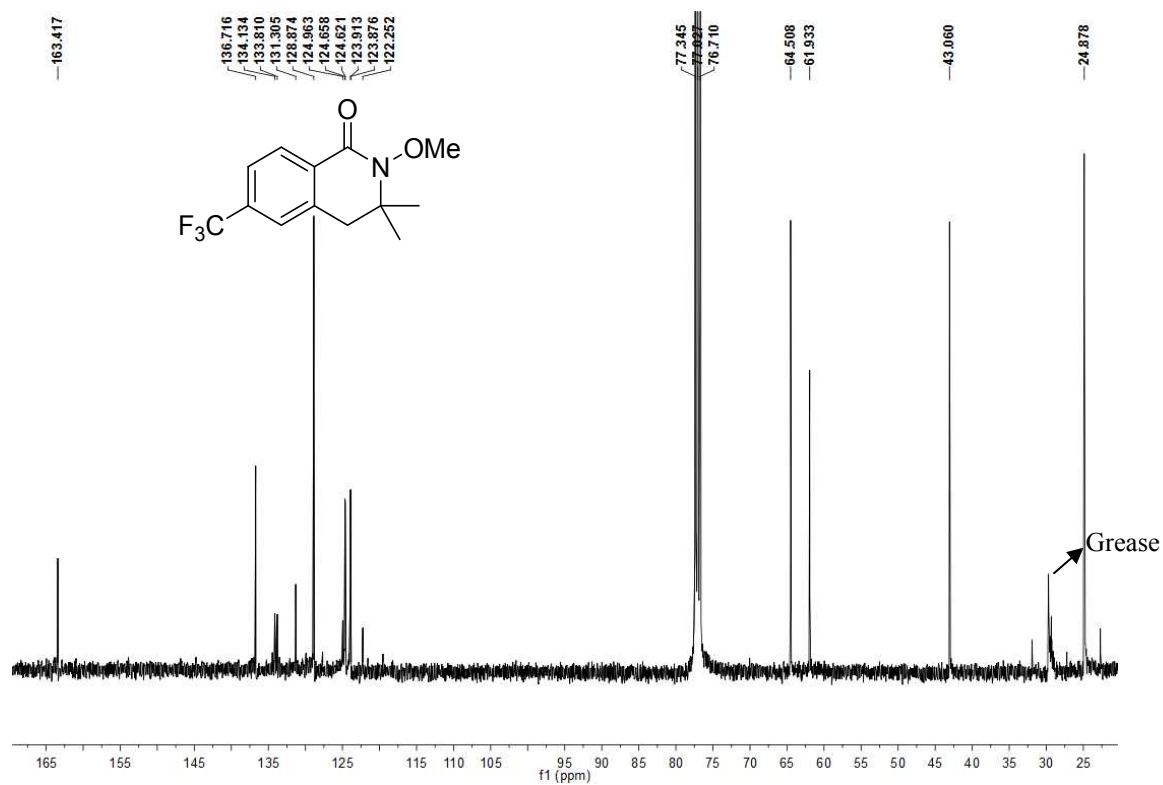

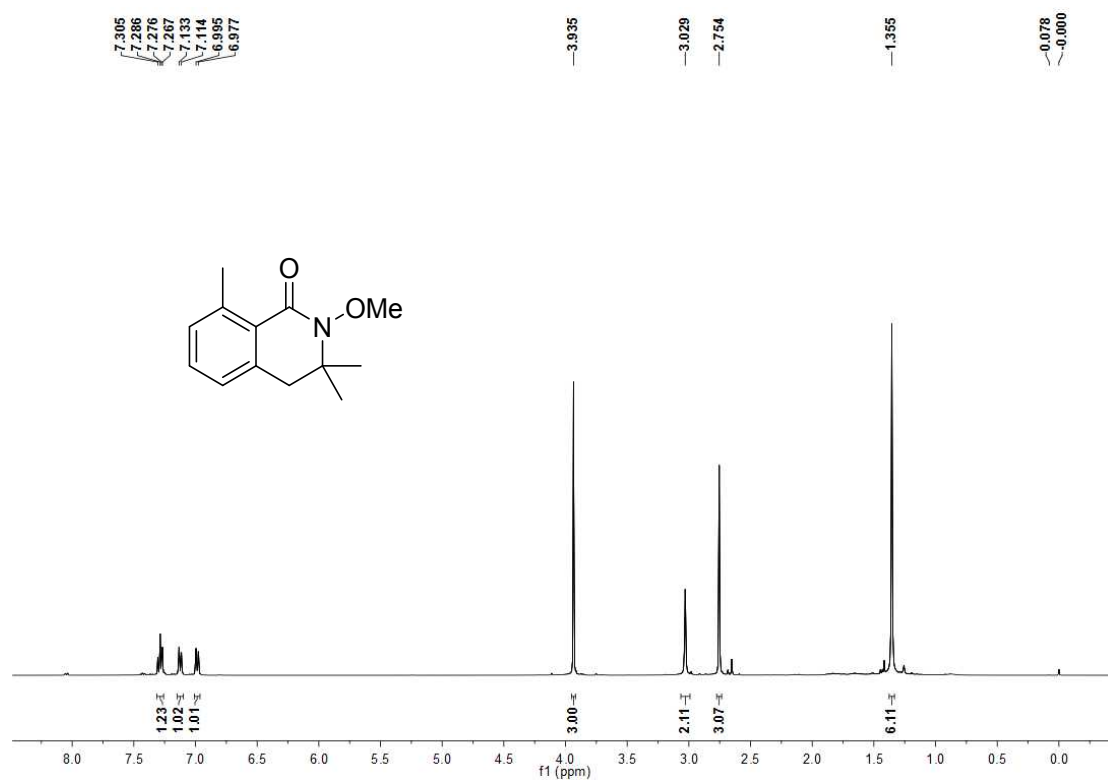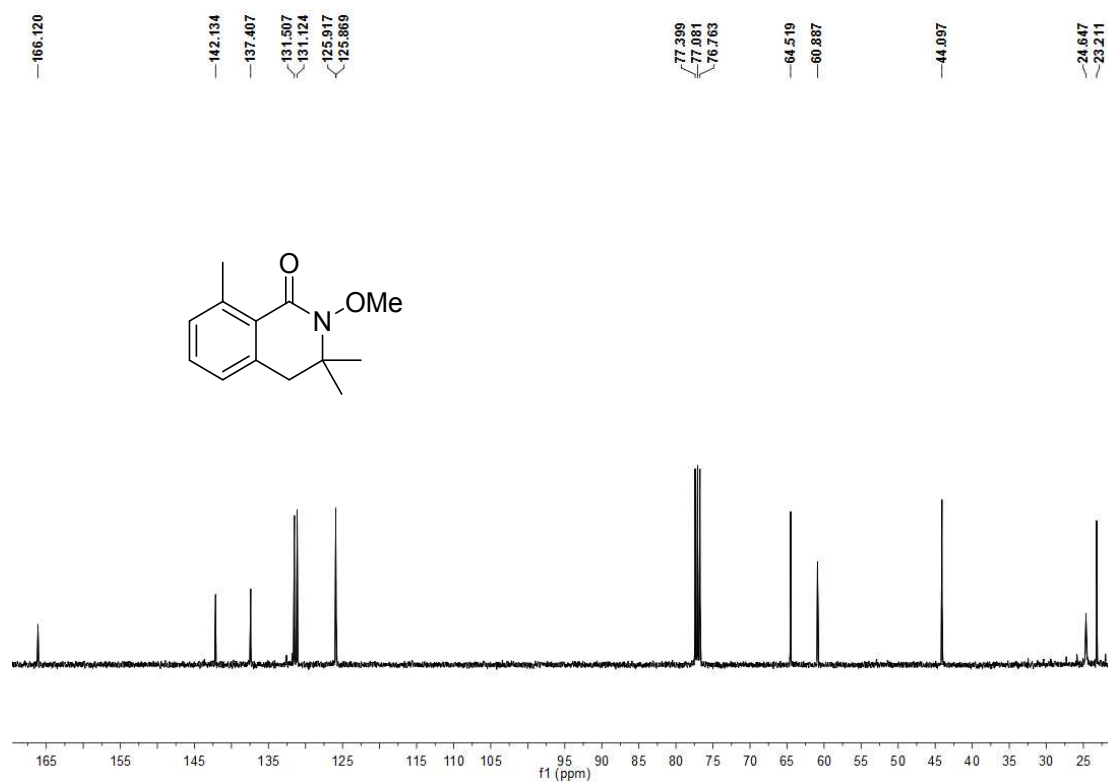

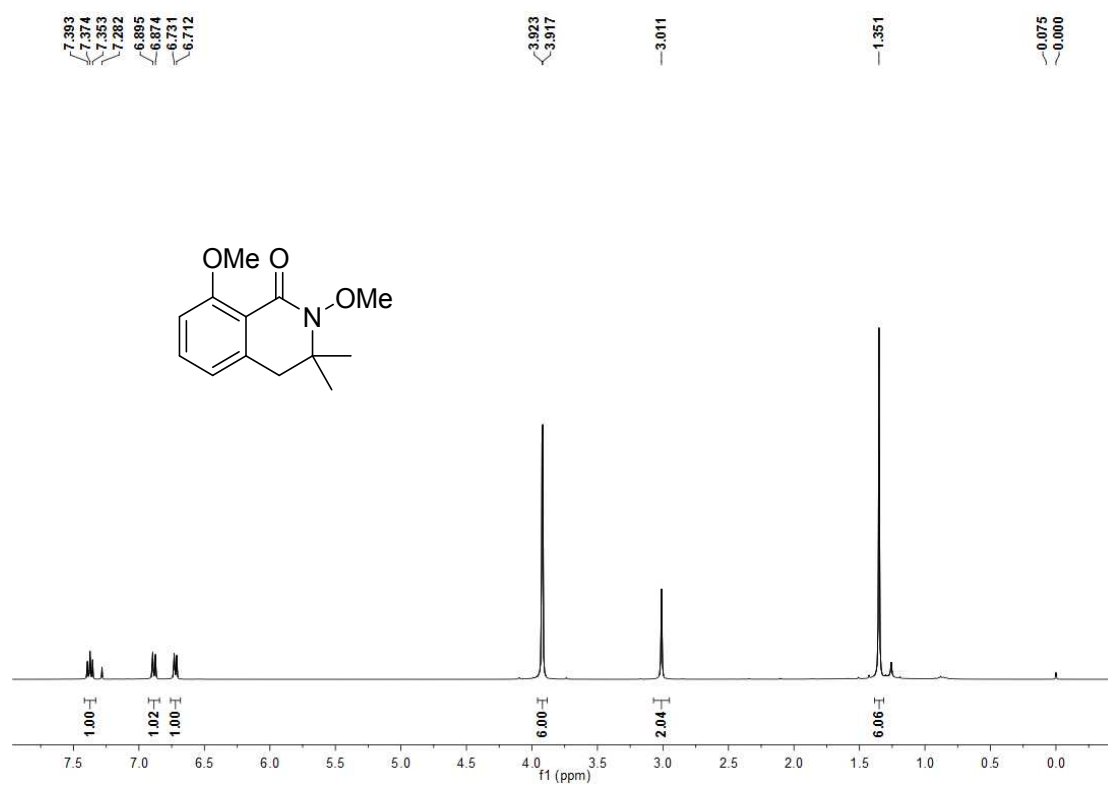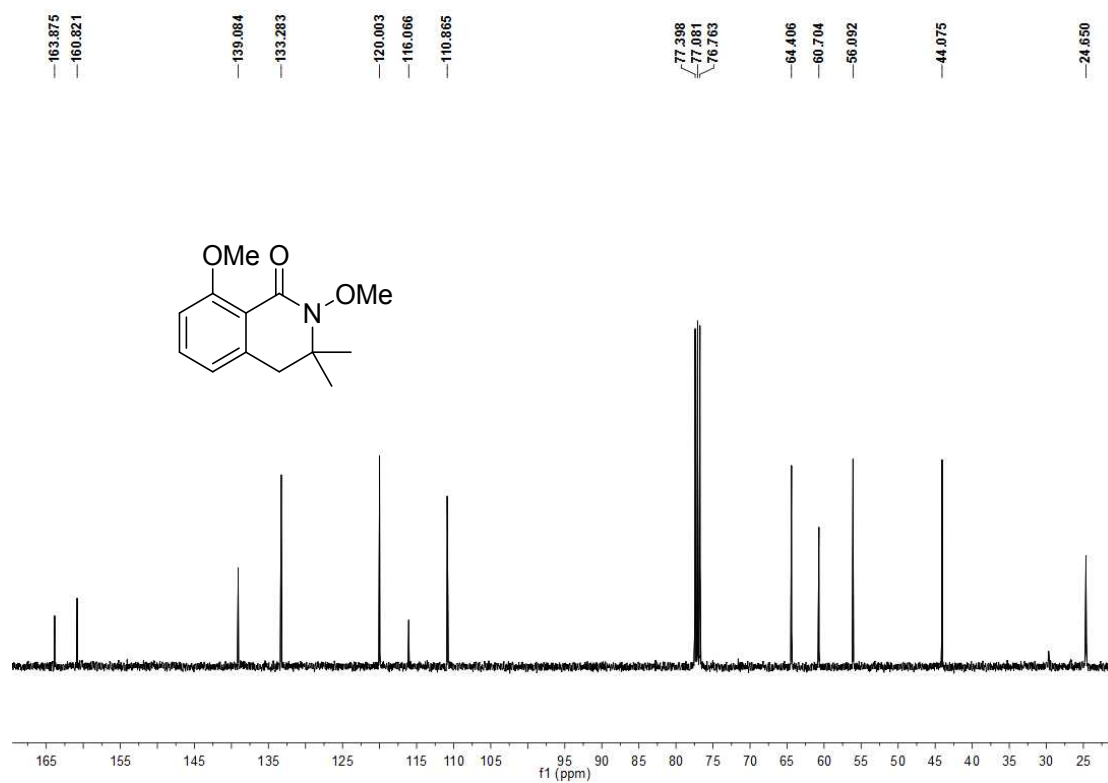

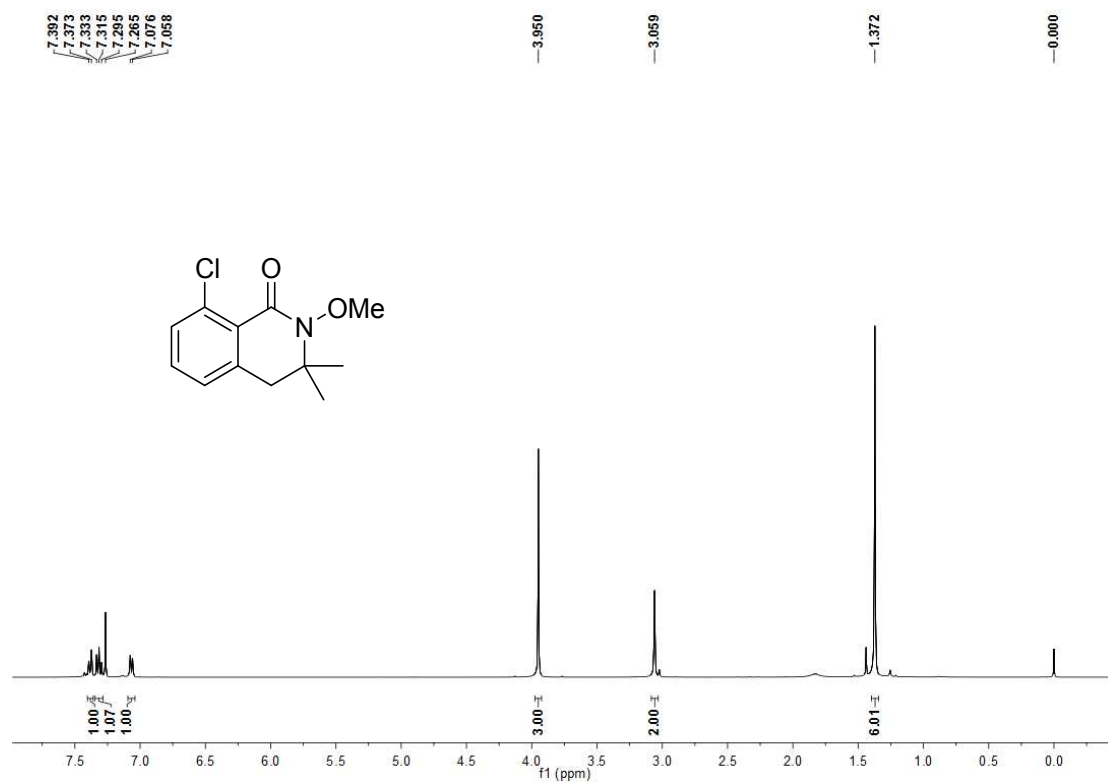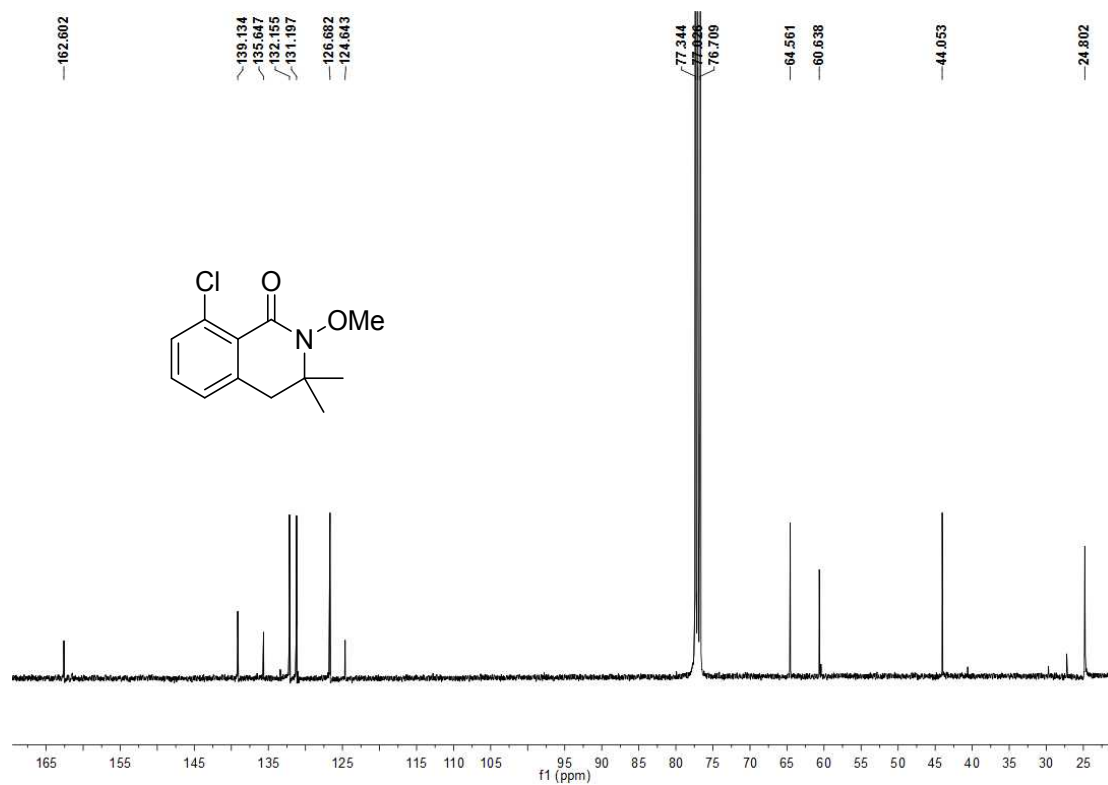

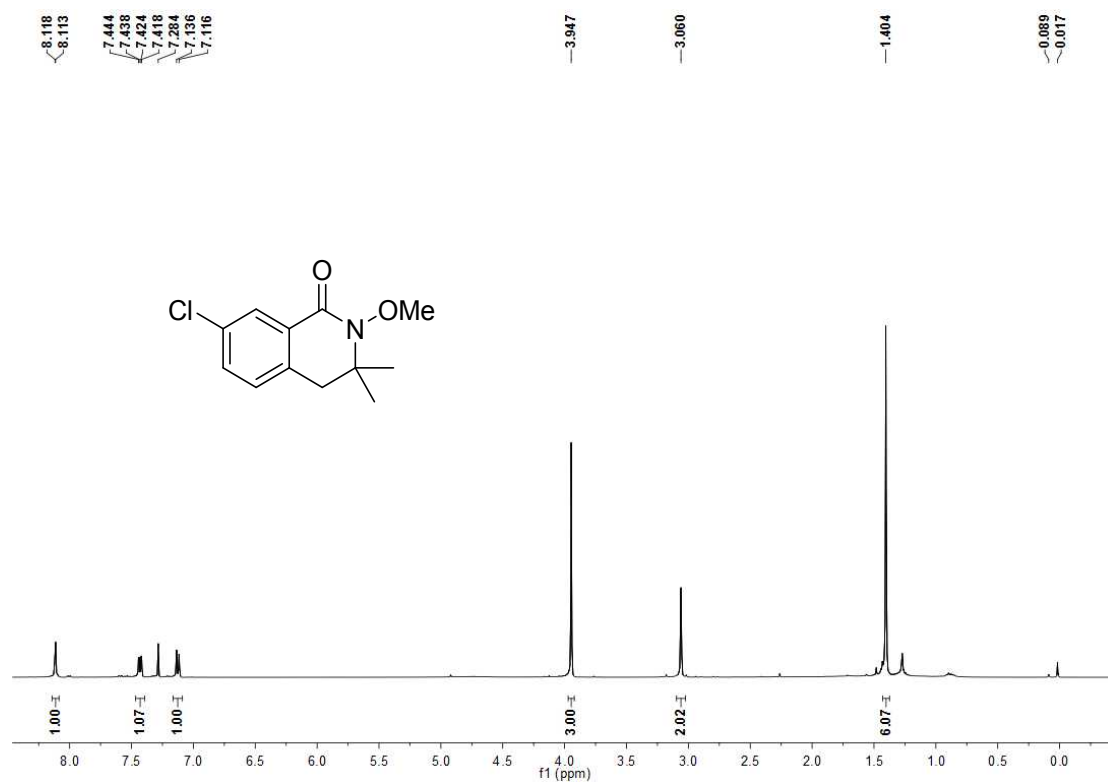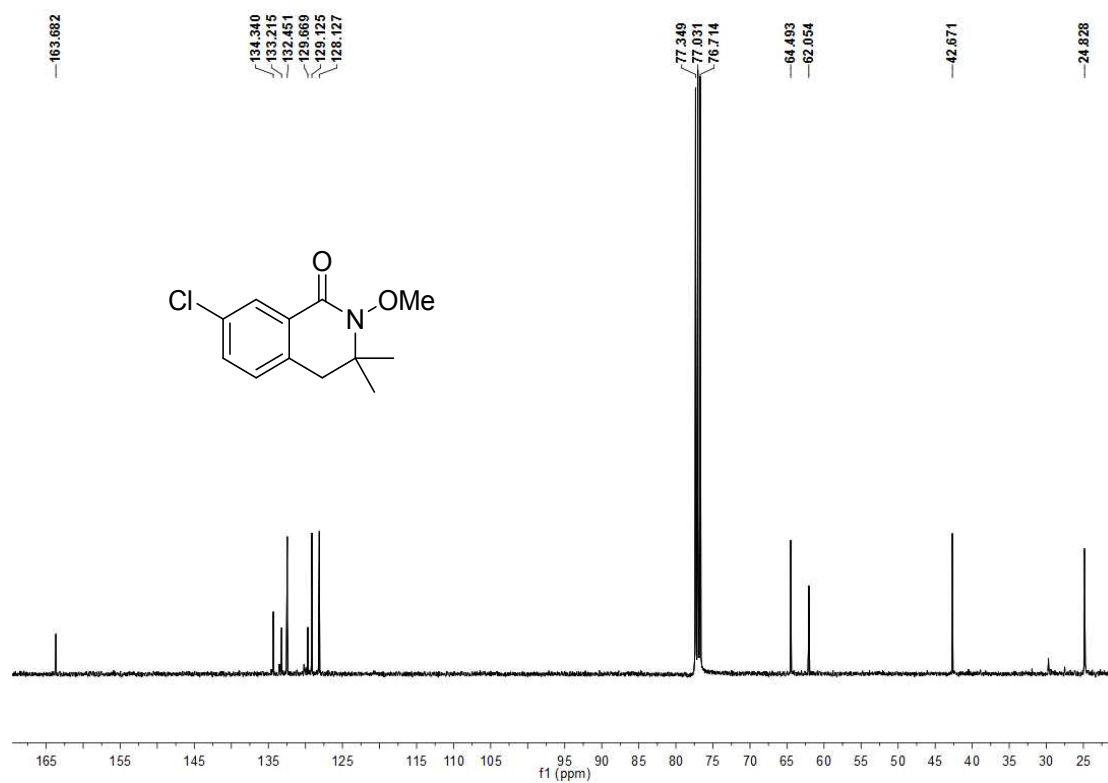

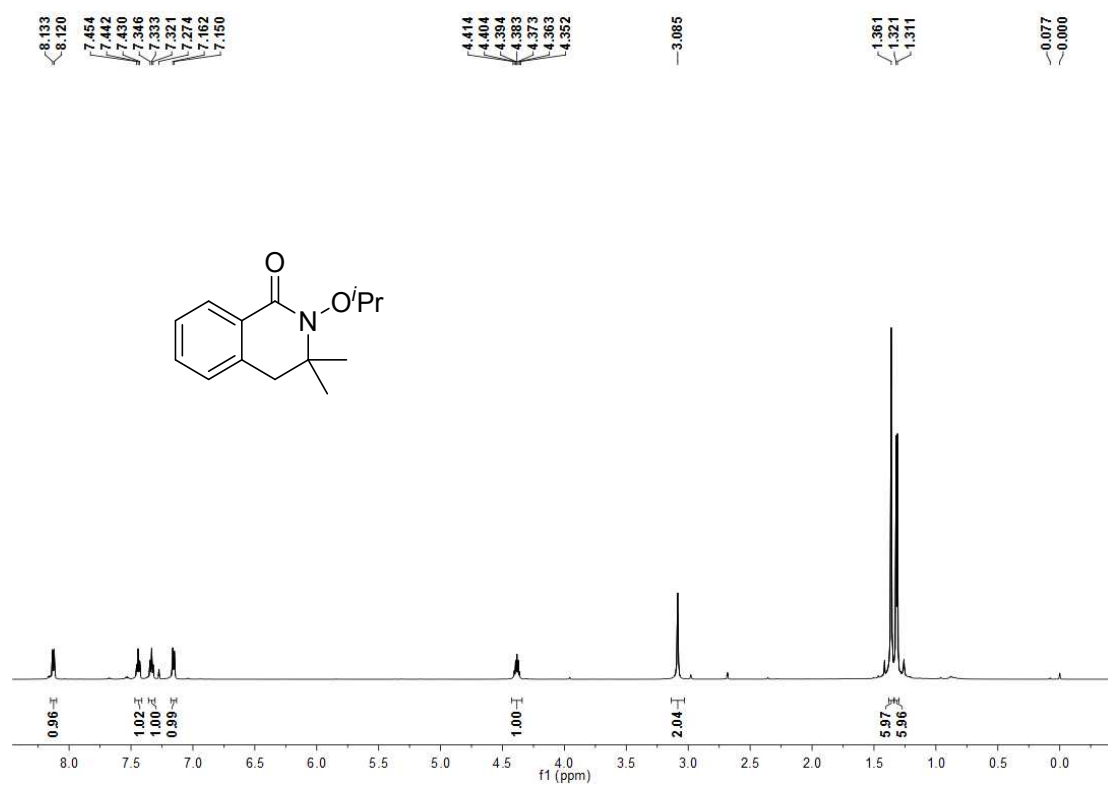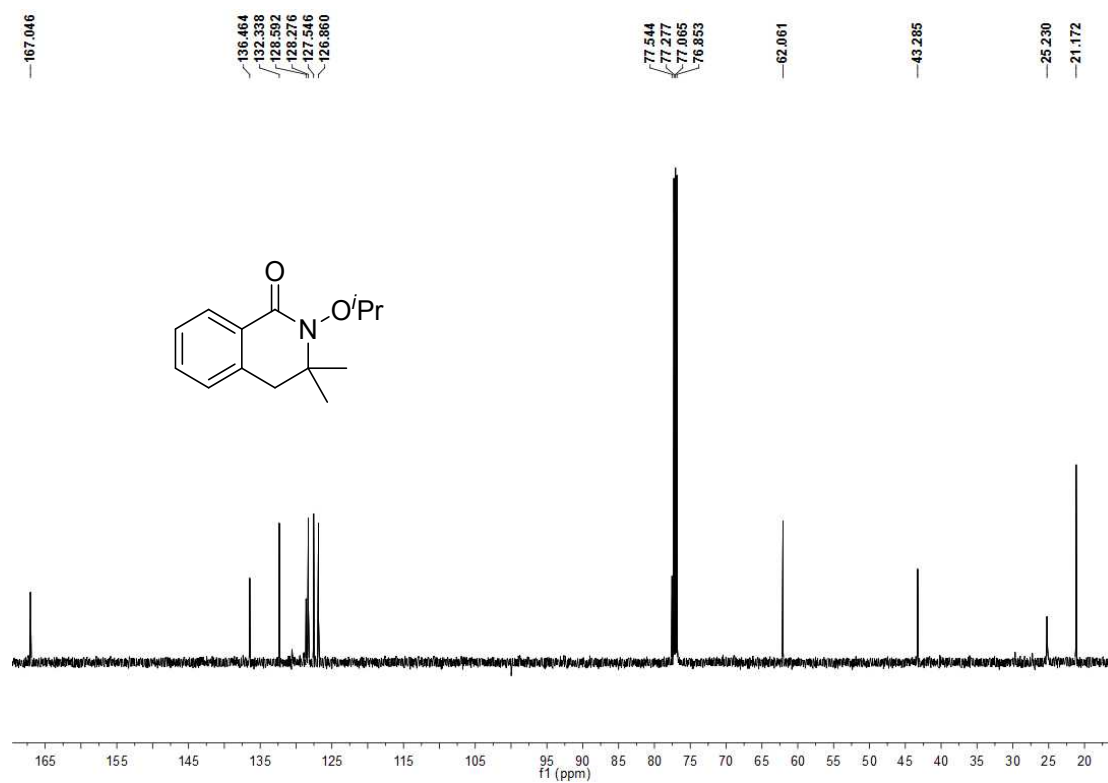



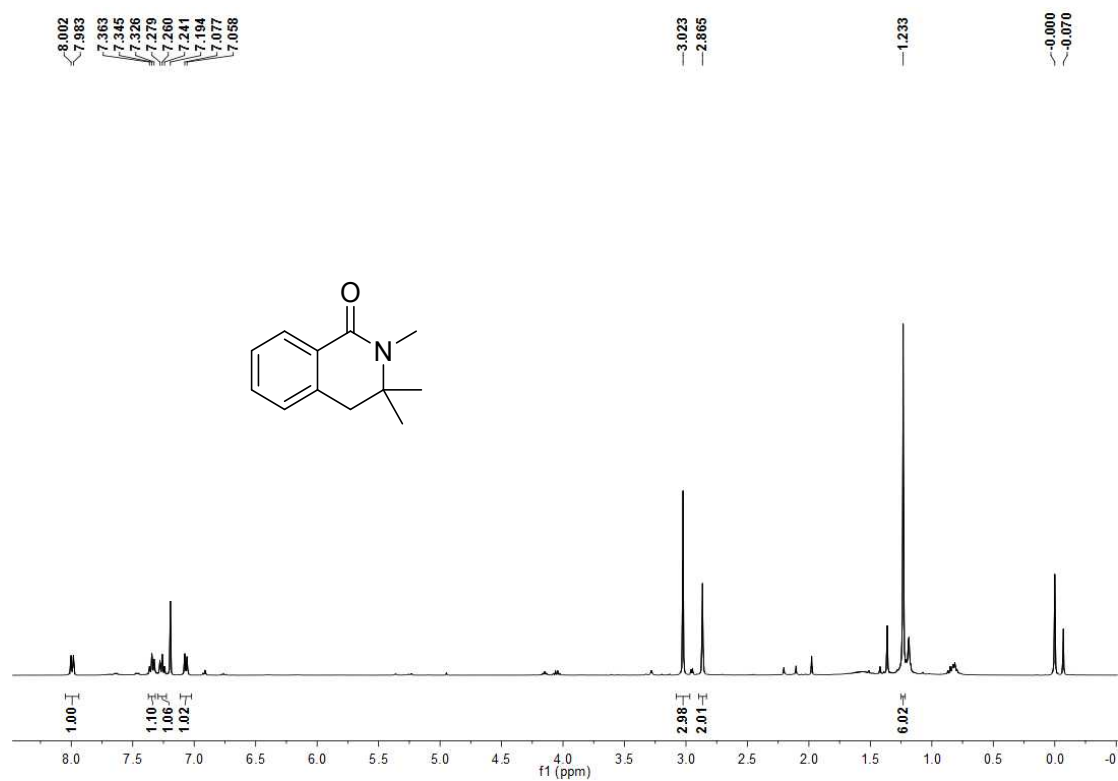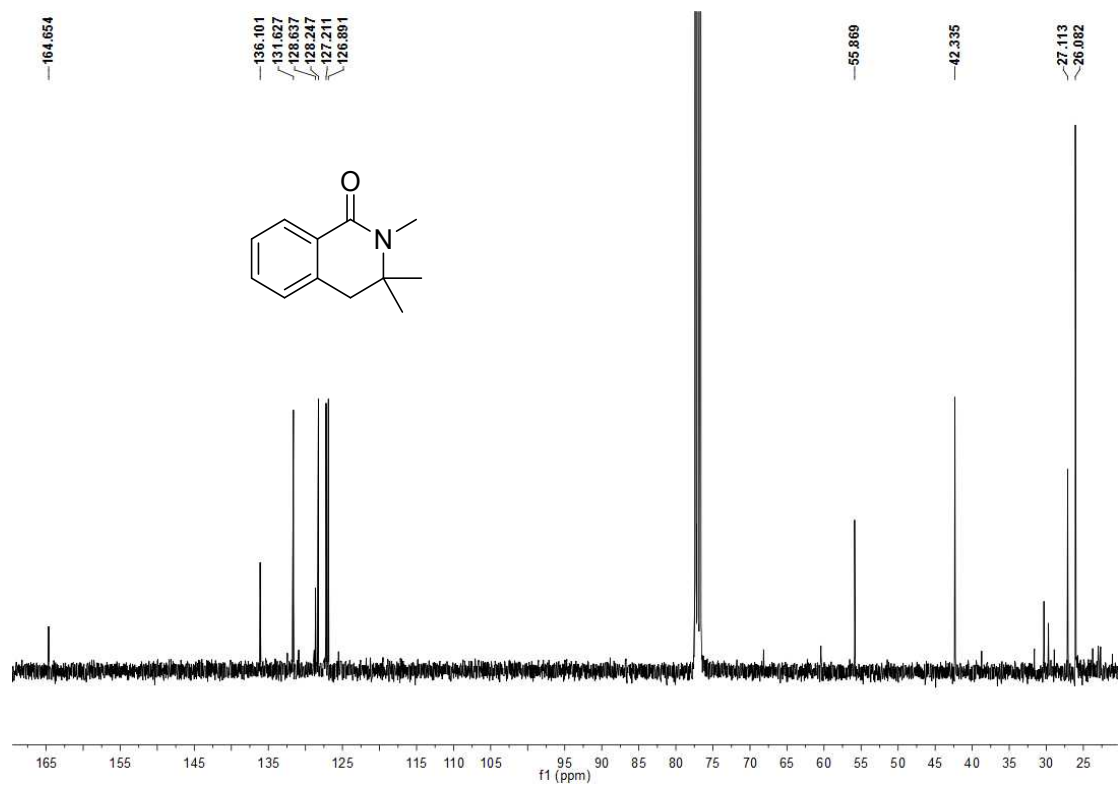

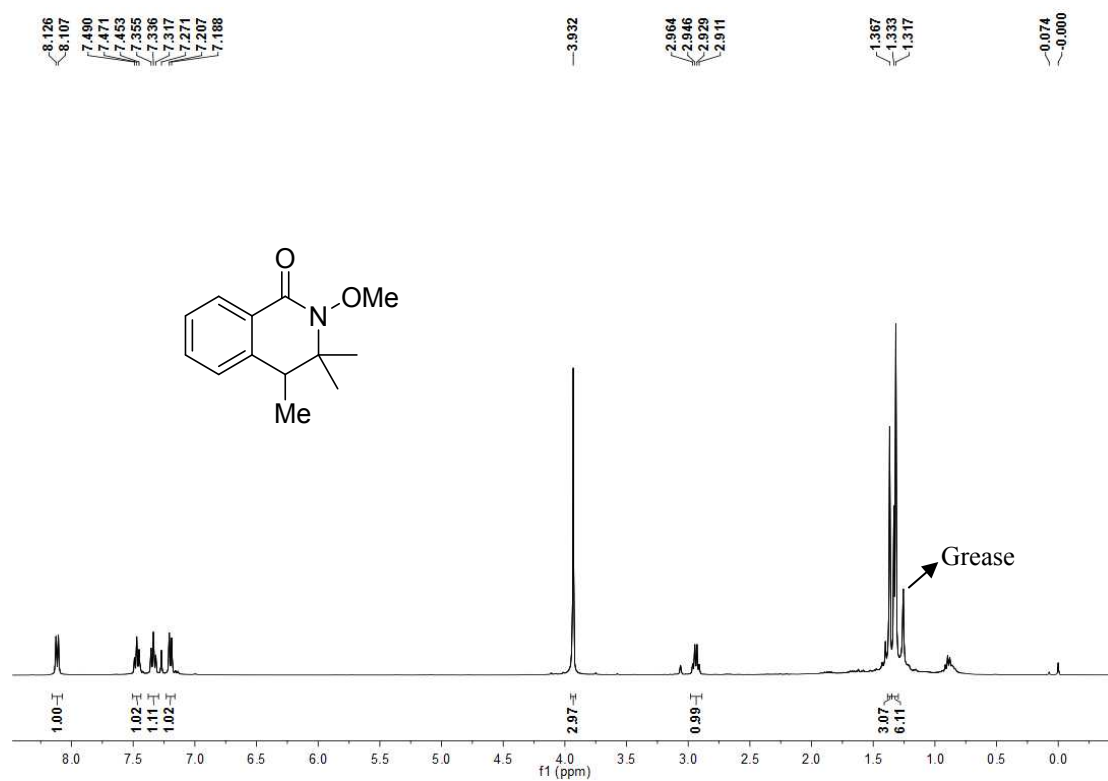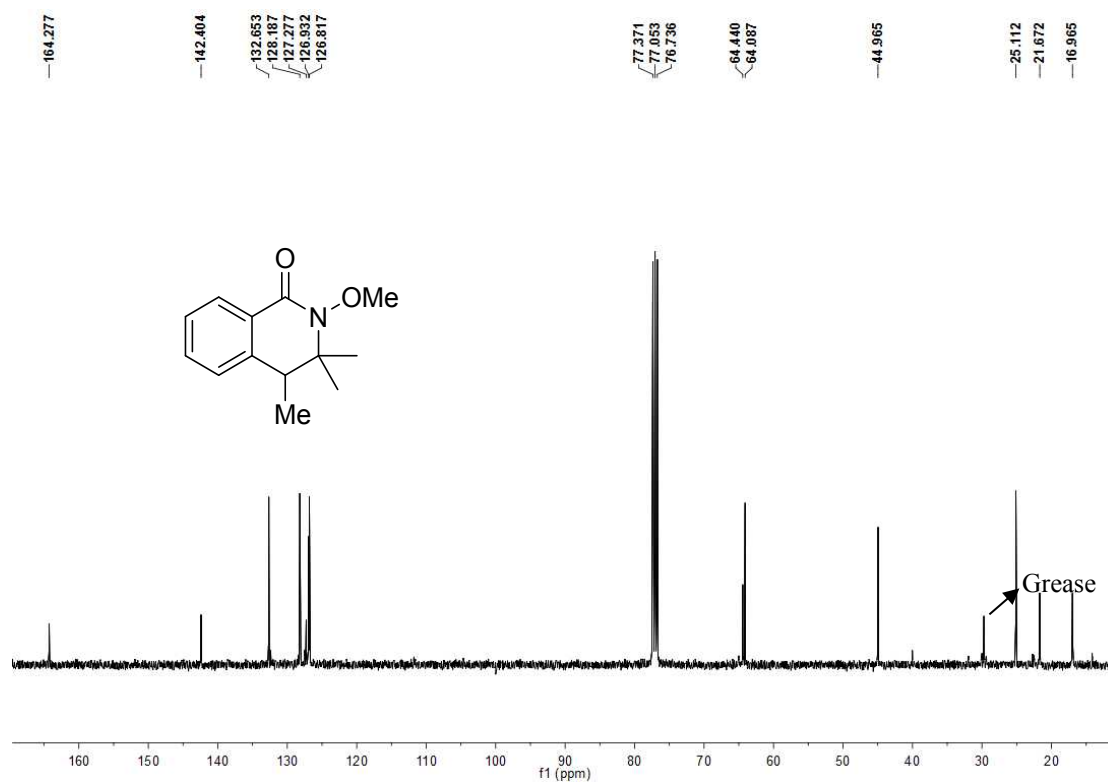

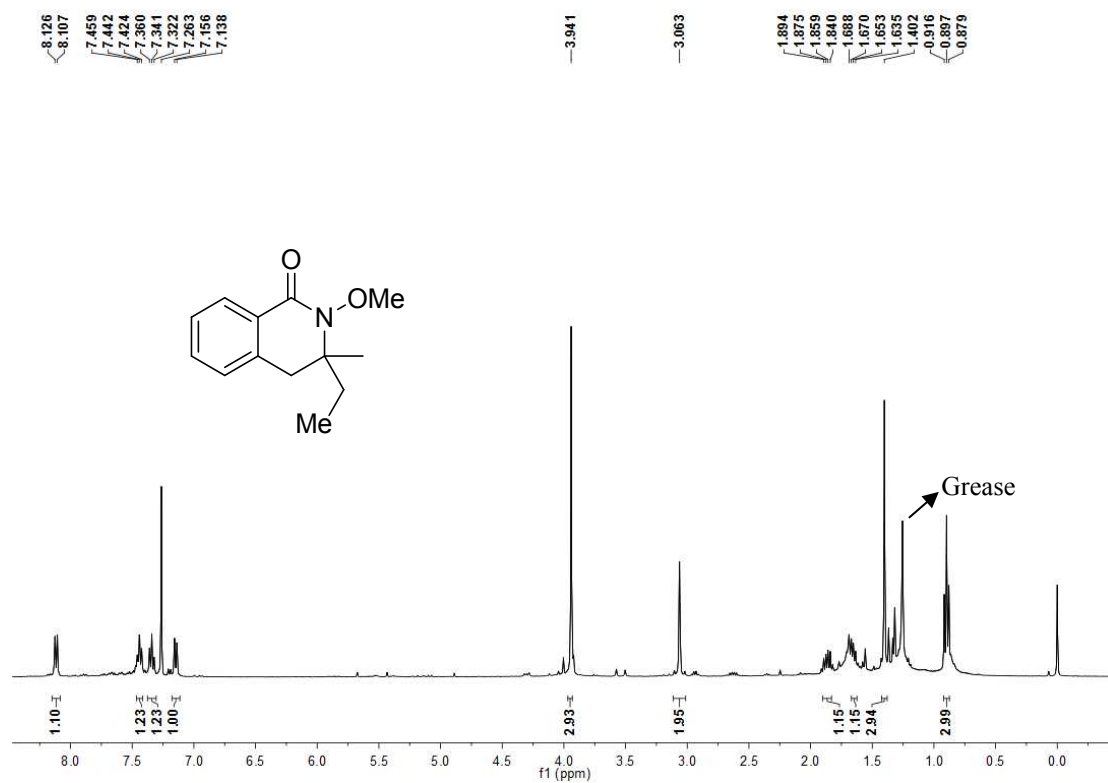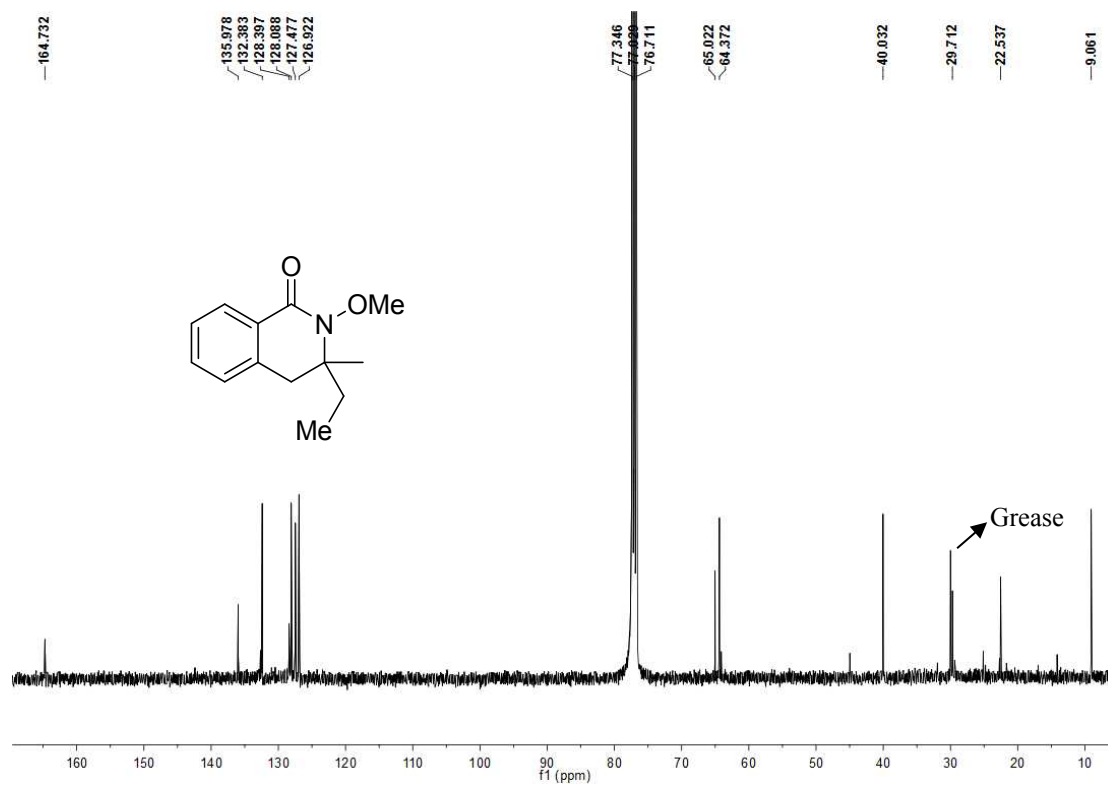

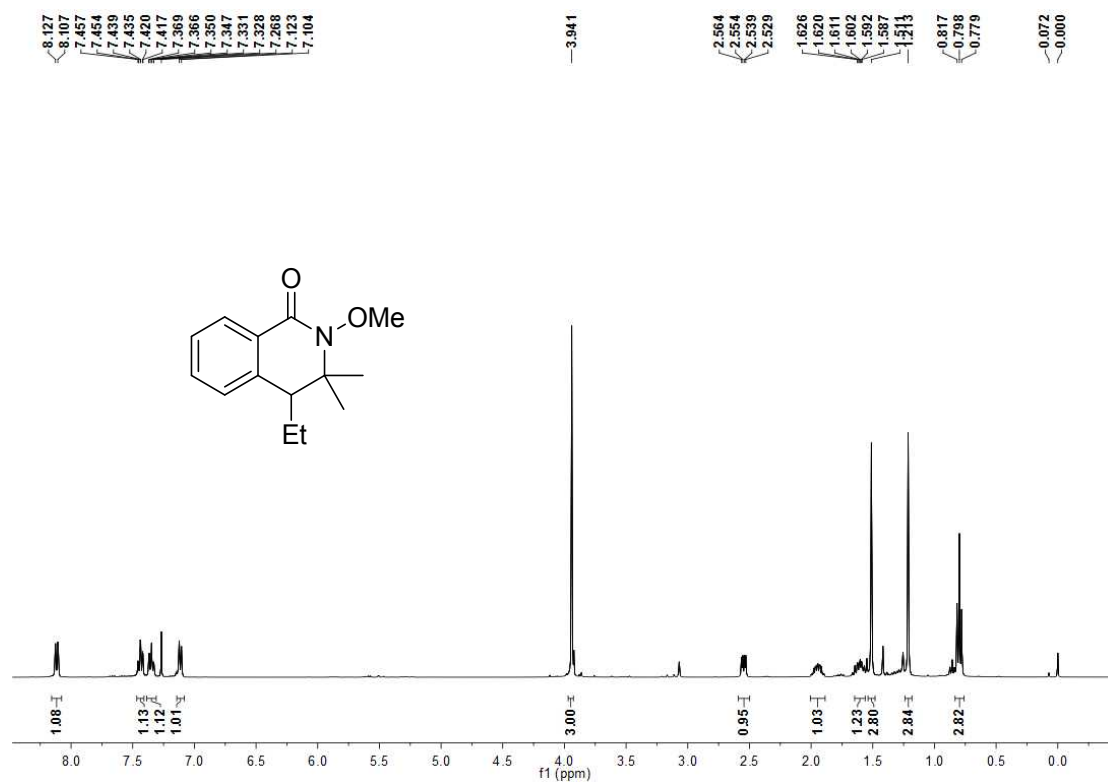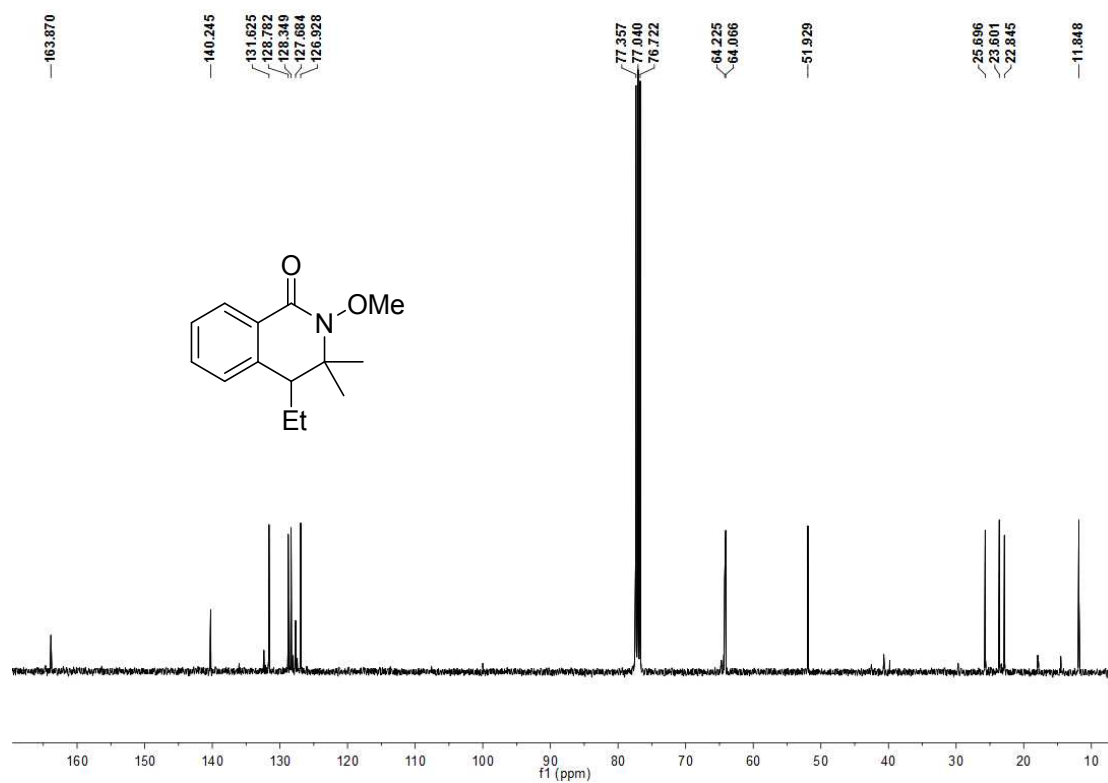

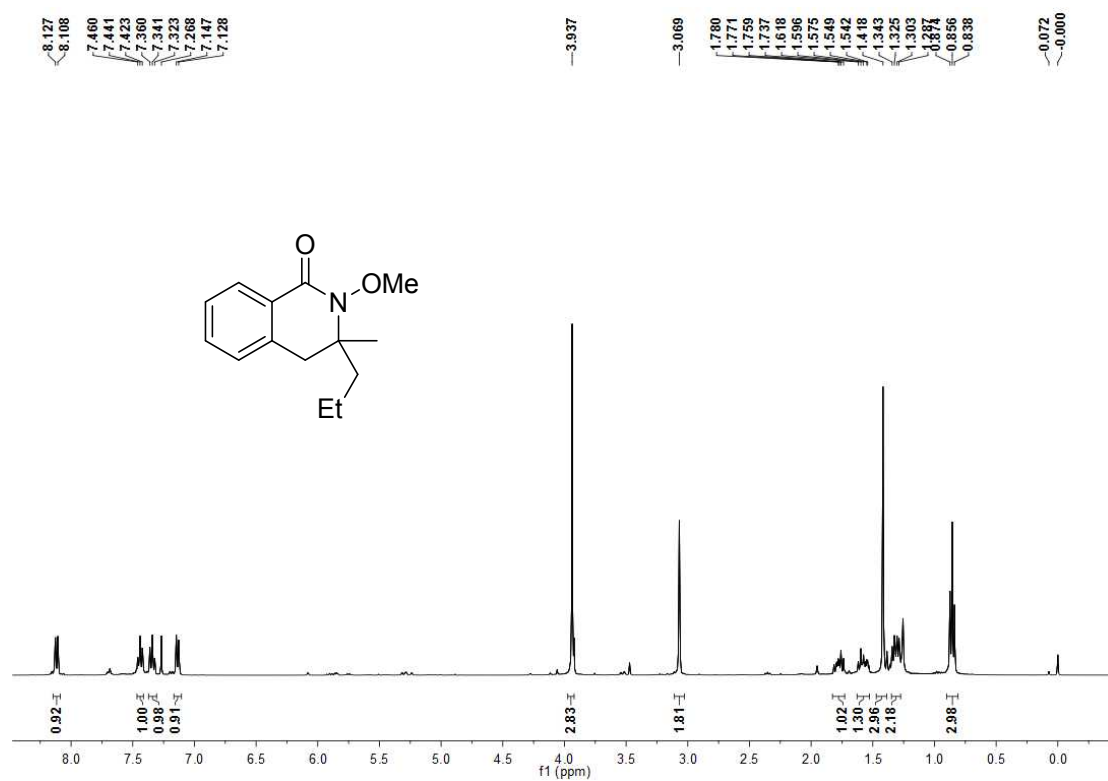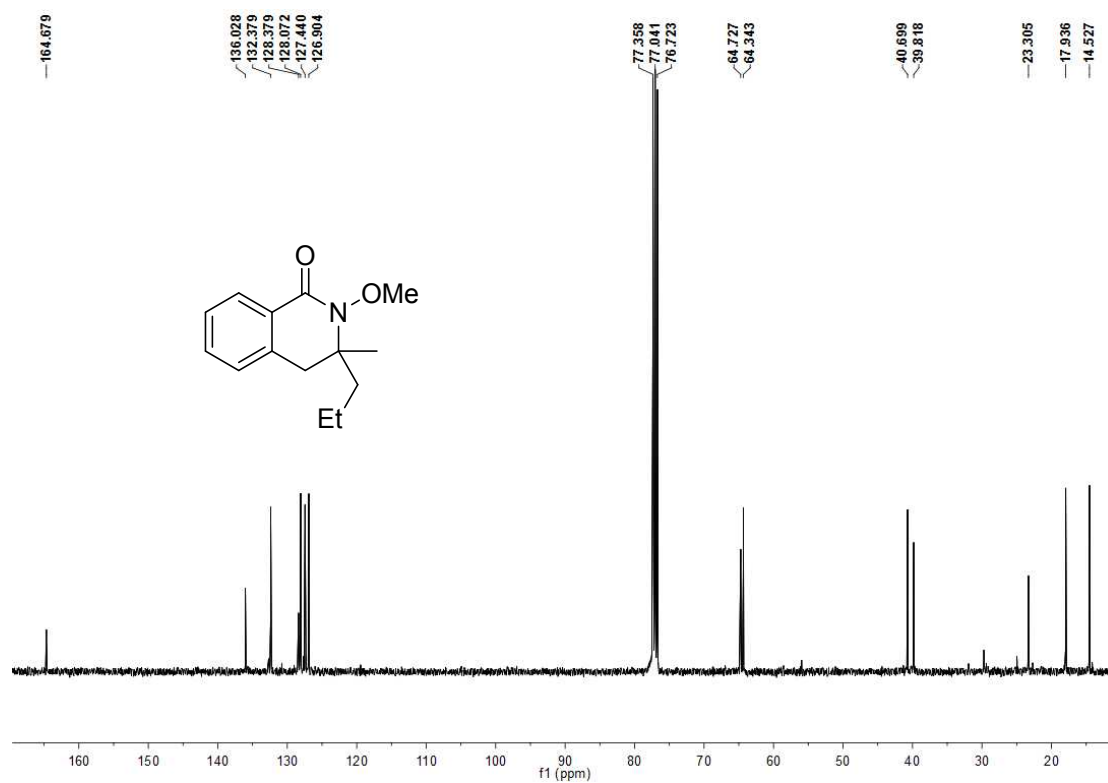

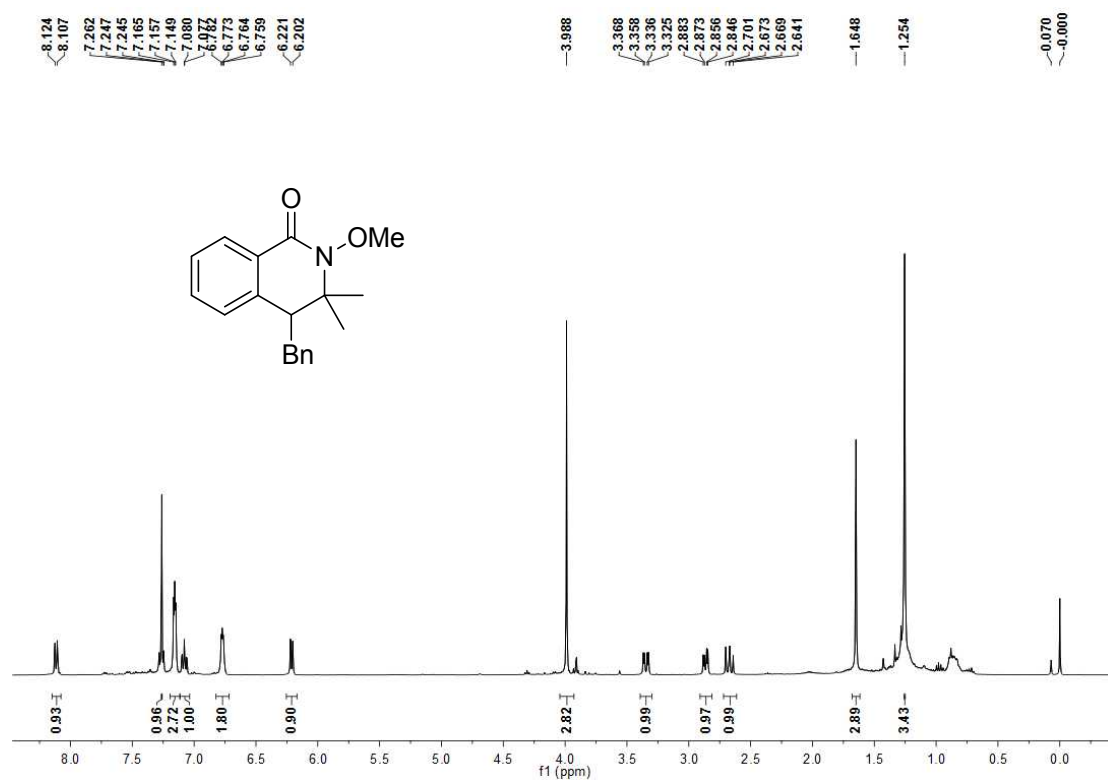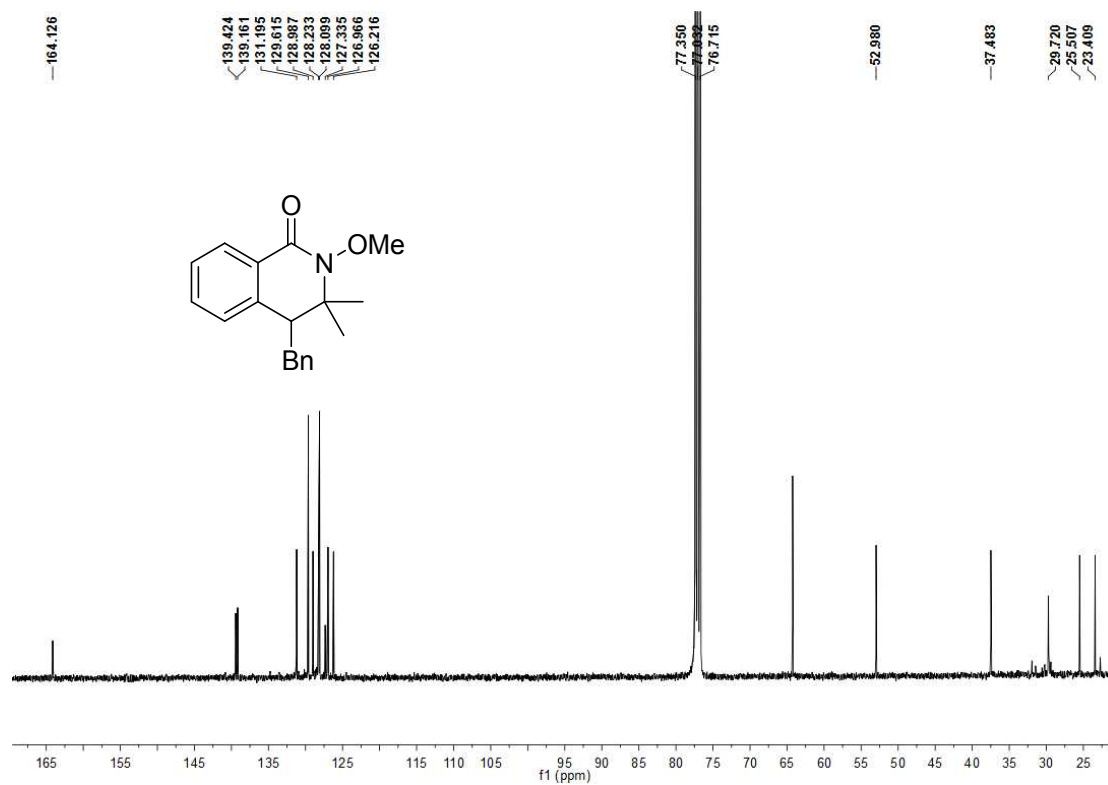

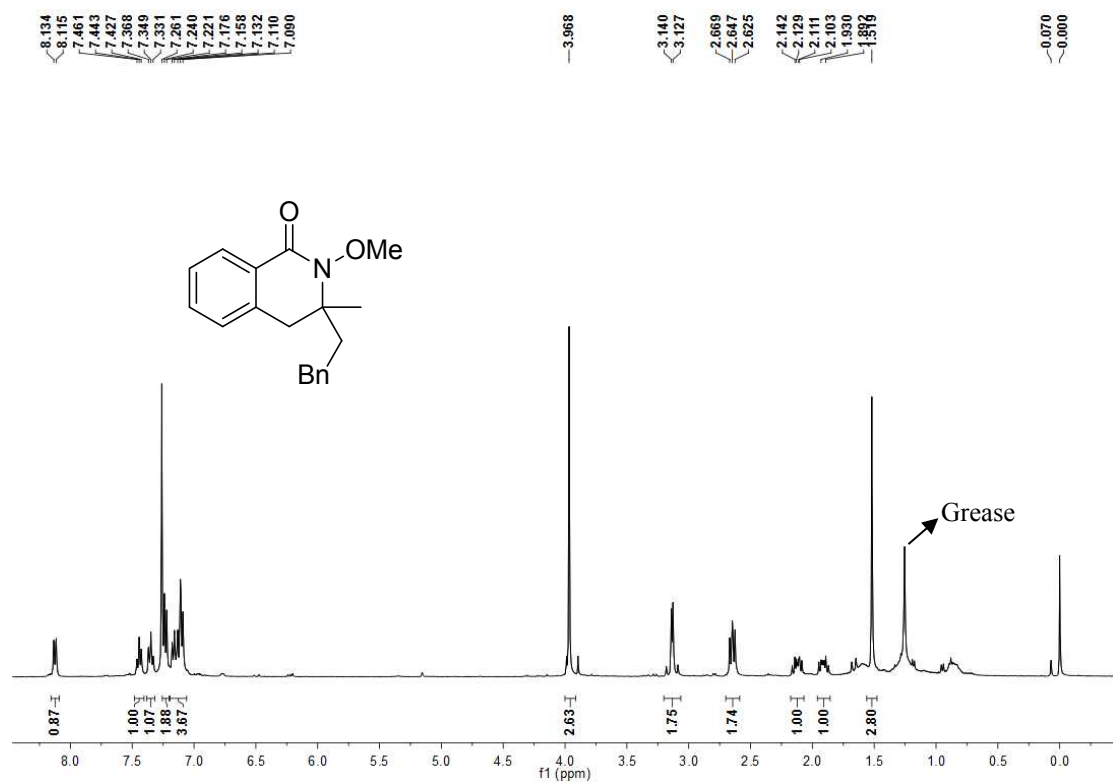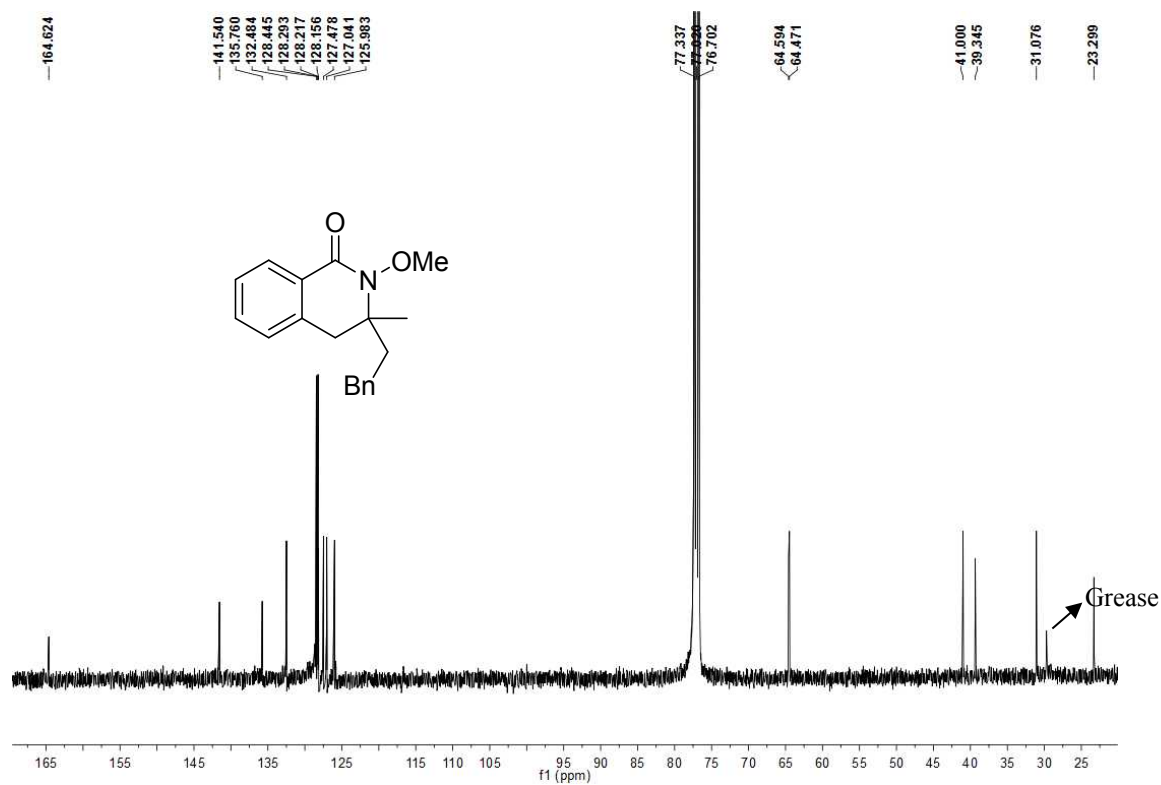

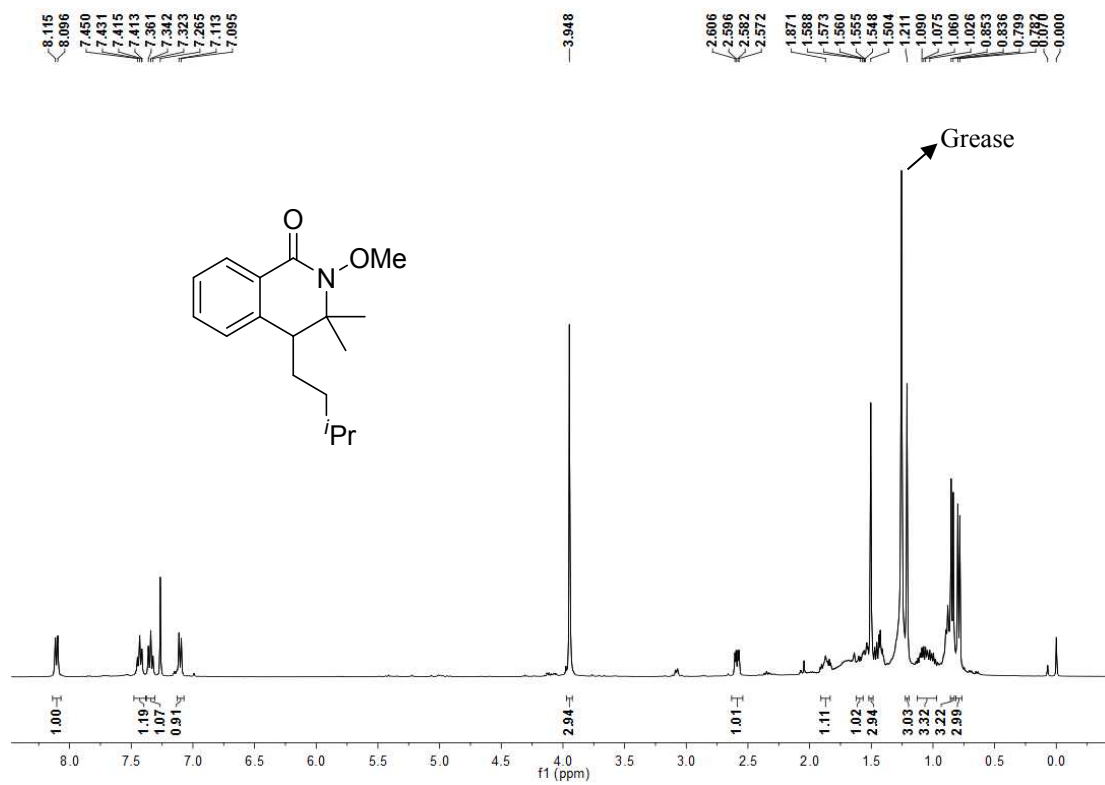



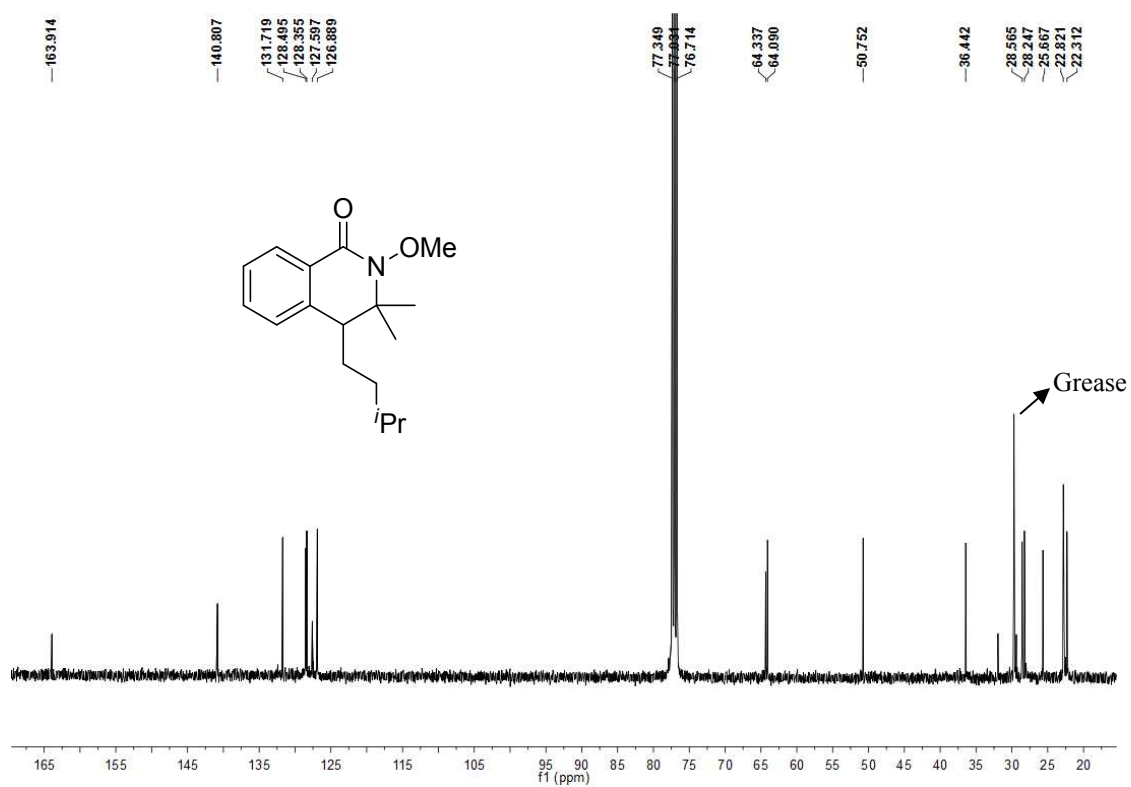

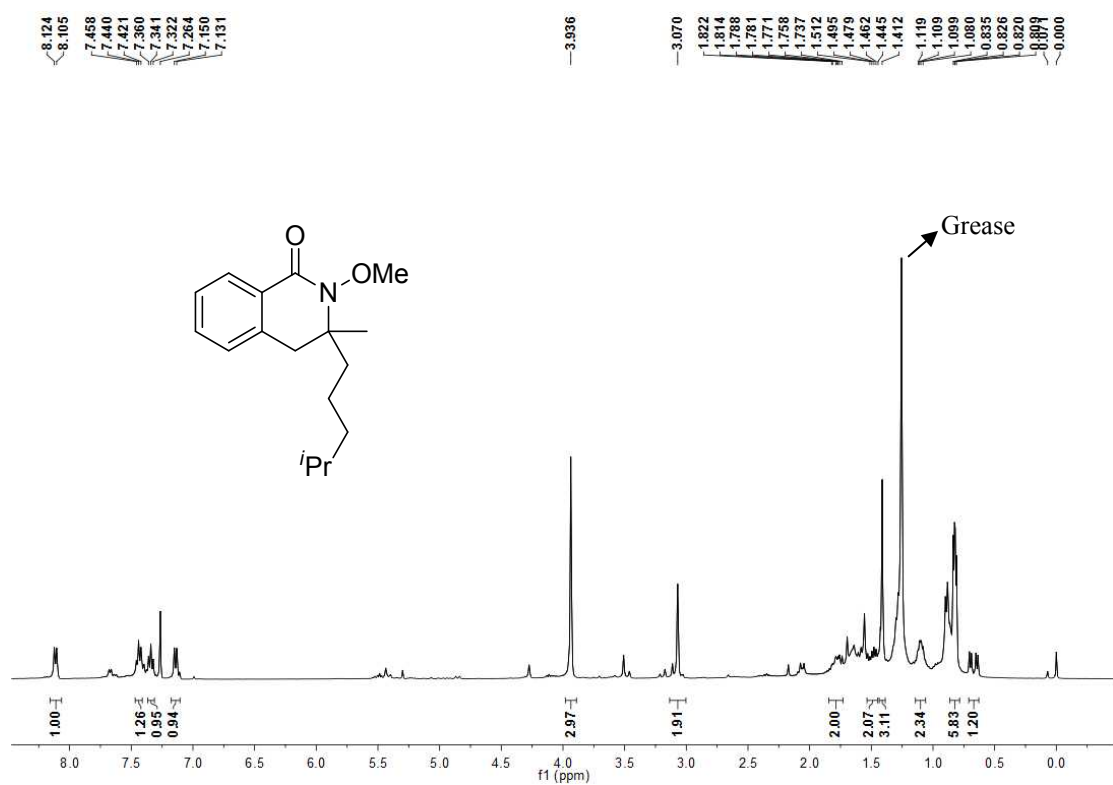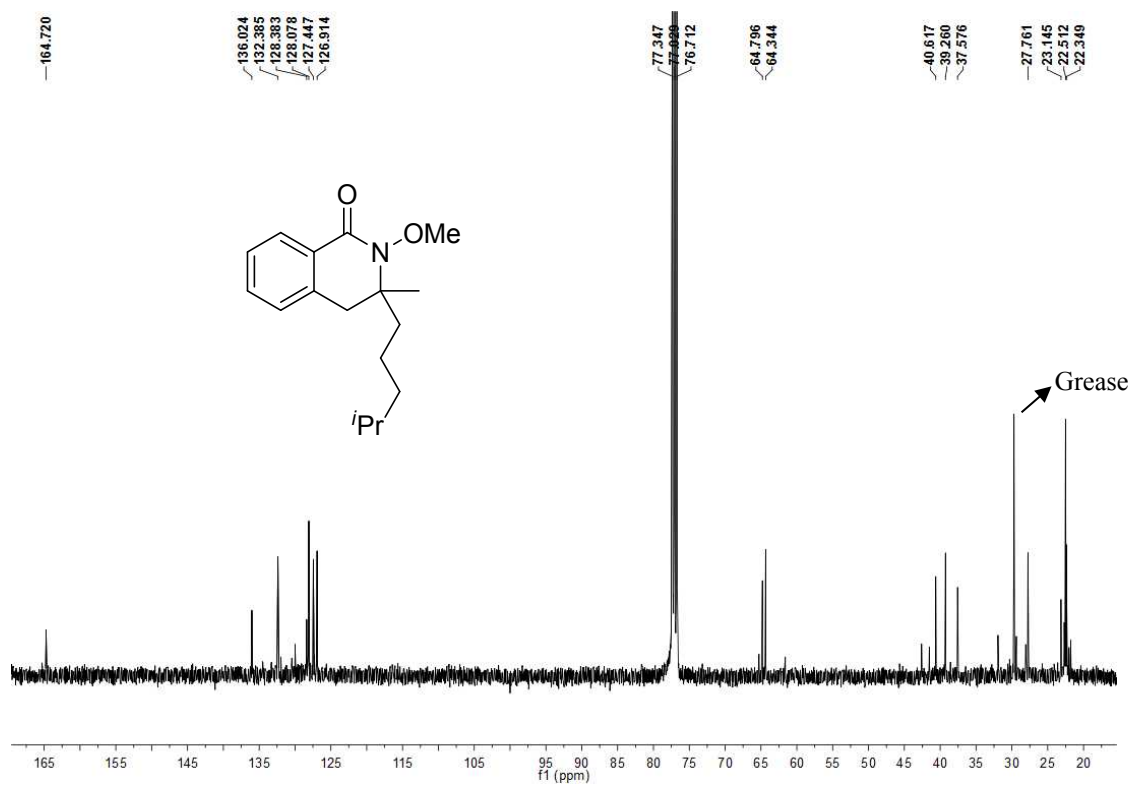

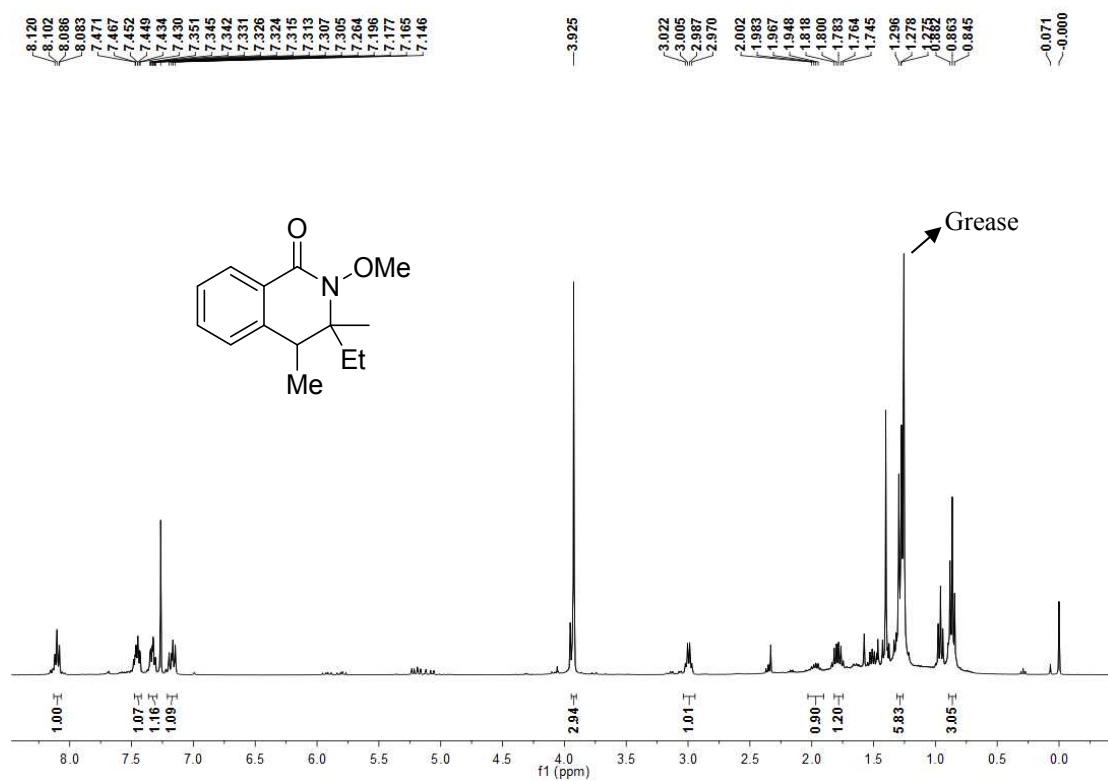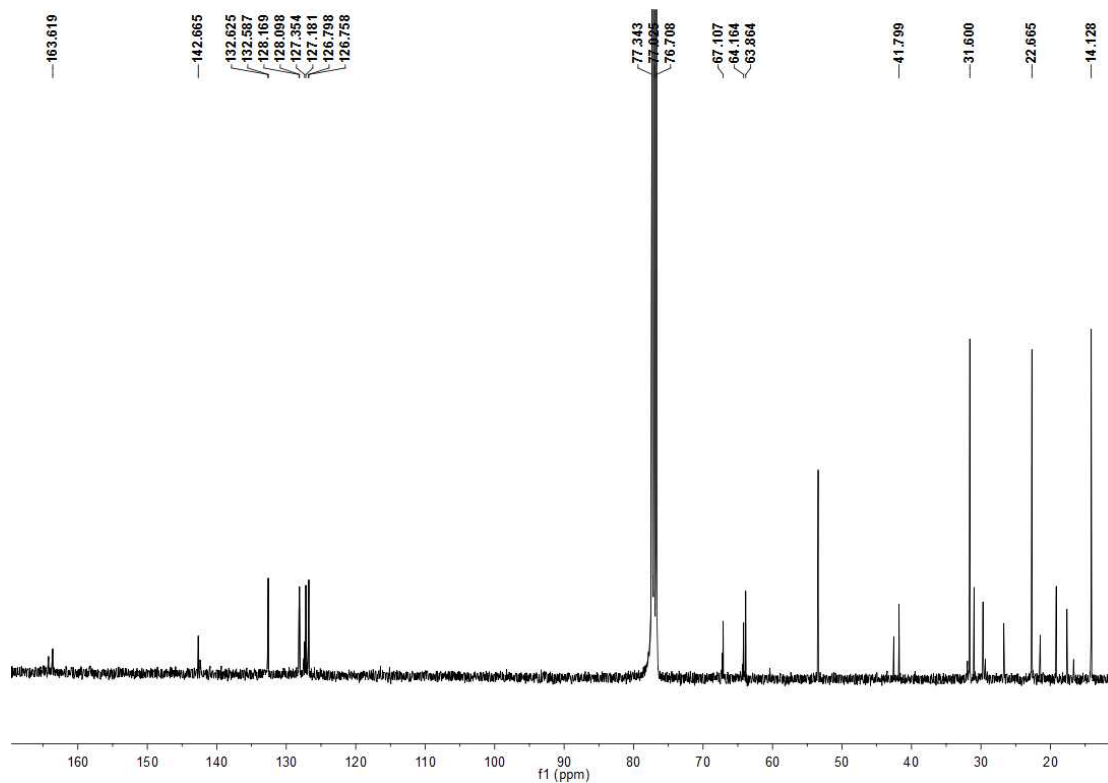

## X-ray Structure and Data of 18a

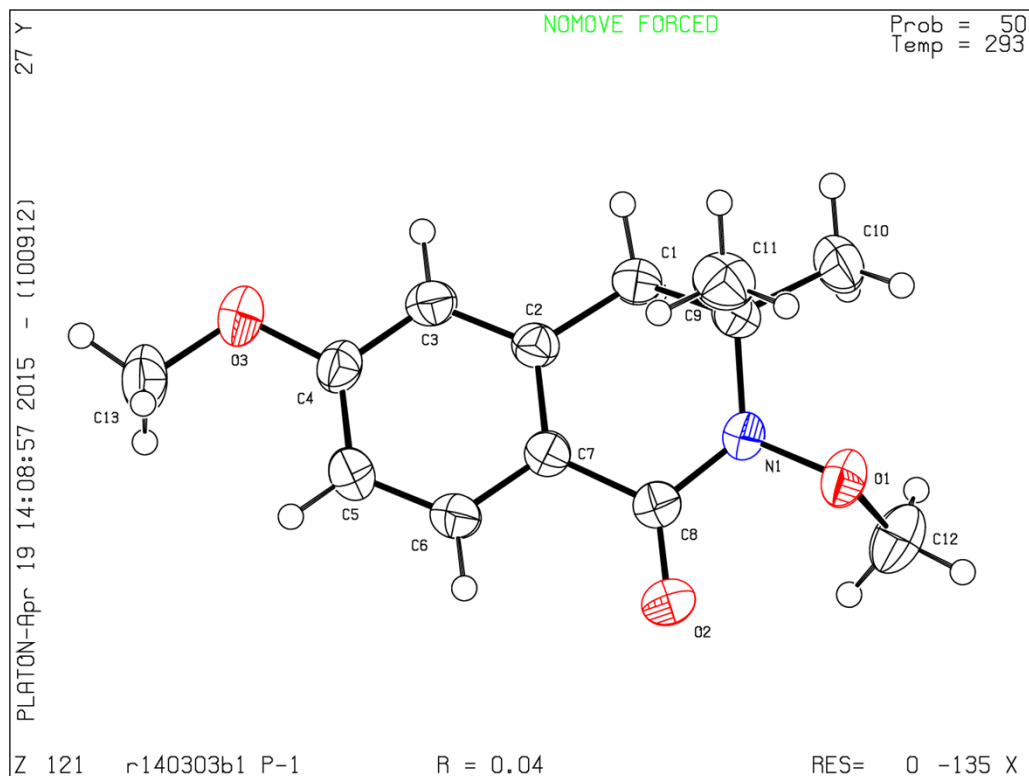

Table 1. Crystal data and structure refinement for 18a.

|                             |                                                  |                        |
|-----------------------------|--------------------------------------------------|------------------------|
| Identification code         | <b>18a</b>                                       |                        |
| Empirical formula           | C <sub>13</sub> H <sub>17</sub> N O <sub>3</sub> |                        |
| Formula weight              | 235.28                                           |                        |
| Temperature                 | 293(2) K                                         |                        |
| Wavelength                  | 0.71073 Å                                        |                        |
| Crystal system, space group | Triclinic, P-1                                   |                        |
| Unit cell dimensions        | a = 7.6086(15) Å                                 | alpha = 108.24(3) deg. |
|                             | b = 7.9394(16) Å                                 | beta = 102.74(3) deg.  |
|                             | c = 11.314(2) Å                                  | gamma = 98.42(3) deg.  |
| Volume                      | 615.7(2) Å <sup>3</sup>                          |                        |
| Z, Calculated density       | 2, 1.269 Mg/m <sup>3</sup>                       |                        |
| Absorption coefficient      | 0.090 mm <sup>-1</sup>                           |                        |

|                                   |                                             |
|-----------------------------------|---------------------------------------------|
| F(000)                            | 252                                         |
| Crystal size                      | 0.20 x 0.18 x 0.12 mm                       |
| Theta range for data collection   | 1.98 to 27.96 deg.                          |
| Limiting indices                  | -10 ≤ h ≤ 8, -10 ≤ k ≤ 10, -13 ≤ l ≤ 14     |
| Reflections collected / unique    | 6345 / 2903 [R(int) = 0.0457]               |
| Completeness to theta = 27.96     | 98.1 %                                      |
| Absorption correction             | Semi-empirical from equivalents             |
| Max. and min. transmission        | 0.9893 and 0.9822                           |
| Refinement method                 | Full-matrix least-squares on F <sup>2</sup> |
| Data / restraints / parameters    | 2903 / 0 / 158                              |
| Goodness-of-fit on F <sup>2</sup> | 1.034                                       |
| Final R indices [I > 2σ(I)]       | R1 = 0.0434, wR2 = 0.1028                   |
| R indices (all data)              | R1 = 0.0813, wR2 = 0.1108                   |
| Largest diff. peak and hole       | 0.165 and -0.181 e.Å <sup>-3</sup>          |

**Table 2. Atomic coordinates ( × 10<sup>4</sup>) and equivalent isotropic displacement parameters (Å<sup>2</sup> × 10<sup>3</sup>) for 18a.**

**U(eq) is defined as one third of the trace of the orthogonalized U<sub>ij</sub> tensor.**

|      | x        | y        | z        | U(eq) |
|------|----------|----------|----------|-------|
| O(1) | -1350(1) | -2814(1) | 5674(1)  | 44(1) |
| O(2) | 2047(1)  | -2125(2) | 7153(1)  | 59(1) |
| O(3) | 3926(1)  | 5355(1)  | 11895(1) | 53(1) |
| N(1) | -785(2)  | -1452(2) | 6923(1)  | 36(1) |
| C(1) | -1402(2) | 1042(2)  | 8511(1)  | 39(1) |
| C(2) | 643(2)   | 1693(2)  | 9164(1)  | 34(1) |
| C(3) | 1418(2)  | 3256(2)  | 10244(1) | 40(1) |

---

|       |          |          |          |       |
|-------|----------|----------|----------|-------|
| C(4)  | 3316(2)  | 3777(2)  | 10838(1) | 39(1) |
| C(5)  | 4466(2)  | 2714(2)  | 10345(1) | 43(1) |
| C(6)  | 3697(2)  | 1148(2)  | 9271(1)  | 41(1) |
| C(7)  | 1805(2)  | 622(2)   | 8674(1)  | 35(1) |
| C(8)  | 1069(2)  | -1089(2) | 7519(1)  | 38(1) |
| C(9)  | -1876(2) | -36(2)   | 7053(1)  | 37(1) |
| C(10) | -3932(2) | -967(2)  | 6546(2)  | 54(1) |
| C(11) | -1395(2) | 1171(2)  | 6305(2)  | 54(1) |
| C(12) | -1873(2) | -4572(2) | 5765(2)  | 62(1) |
| C(13) | 5856(2)  | 5899(2)  | 12561(2) | 61(1) |

---

**Table 3. Bond lengths [Å] and angles [deg] for 18a.**

---

|            |            |
|------------|------------|
| O(1)-N(1)  | 1.4110(14) |
| O(1)-C(12) | 1.4359(18) |
| O(2)-C(8)  | 1.2260(15) |
| O(3)-C(4)  | 1.3644(17) |
| O(3)-C(13) | 1.4260(19) |
| N(1)-C(8)  | 1.3666(17) |
| N(1)-C(9)  | 1.4823(16) |
| C(1)-C(2)  | 1.5003(19) |
| C(1)-C(9)  | 1.5316(19) |
| C(1)-H(1A) | 0.9700     |
| C(1)-H(1B) | 0.9700     |
| C(2)-C(3)  | 1.378(2)   |
| C(2)-C(7)  | 1.3983(18) |
| C(3)-C(4)  | 1.390(2)   |
| C(3)-H(3)  | 0.9300     |

|                 |            |
|-----------------|------------|
| C(4)-C(5)       | 1.3874(18) |
| C(5)-C(6)       | 1.376(2)   |
| C(5)-H(5)       | 0.9300     |
| C(6)-C(7)       | 1.3859(19) |
| C(6)-H(6)       | 0.9300     |
| C(7)-C(8)       | 1.486(2)   |
| C(9)-C(11)      | 1.520(2)   |
| C(9)-C(10)      | 1.5240(19) |
| C(10)-H(10A)    | 0.9600     |
| C(10)-H(10B)    | 0.9600     |
| C(10)-H(10C)    | 0.9600     |
| C(11)-H(11A)    | 0.9600     |
| C(11)-H(11B)    | 0.9600     |
| C(11)-H(11C)    | 0.9600     |
| C(12)-H(12A)    | 0.9600     |
| C(12)-H(12B)    | 0.9600     |
| C(12)-H(12C)    | 0.9600     |
| C(13)-H(13A)    | 0.9600     |
| C(13)-H(13B)    | 0.9600     |
| C(13)-H(13C)    | 0.9600     |
| N(1)-O(1)-C(12) | 109.84(11) |
| C(4)-O(3)-C(13) | 117.65(12) |
| C(8)-N(1)-O(1)  | 113.54(10) |
| C(8)-N(1)-C(9)  | 123.50(12) |
| O(1)-N(1)-C(9)  | 113.22(9)  |
| C(2)-C(1)-C(9)  | 113.37(11) |
| C(2)-C(1)-H(1A) | 108.9      |
| C(9)-C(1)-H(1A) | 108.9      |
| C(2)-C(1)-H(1B) | 108.9      |
| C(9)-C(1)-H(1B) | 108.9      |

|                   |            |
|-------------------|------------|
| H(1A)-C(1)-H(1B)  | 107.7      |
| C(3)-C(2)-C(7)    | 118.67(13) |
| C(3)-C(2)-C(1)    | 123.27(12) |
| C(7)-C(2)-C(1)    | 118.02(12) |
| C(2)-C(3)-C(4)    | 121.19(13) |
| C(2)-C(3)-H(3)    | 119.4      |
| C(4)-C(3)-H(3)    | 119.4      |
| O(3)-C(4)-C(5)    | 124.08(13) |
| O(3)-C(4)-C(3)    | 115.96(13) |
| C(5)-C(4)-C(3)    | 119.95(13) |
| C(6)-C(5)-C(4)    | 119.04(13) |
| C(6)-C(5)-H(5)    | 120.5      |
| C(4)-C(5)-H(5)    | 120.5      |
| C(5)-C(6)-C(7)    | 121.29(13) |
| C(5)-C(6)-H(6)    | 119.4      |
| C(7)-C(6)-H(6)    | 119.4      |
| C(6)-C(7)-C(2)    | 119.85(13) |
| C(6)-C(7)-C(8)    | 118.40(13) |
| C(2)-C(7)-C(8)    | 121.75(12) |
| O(2)-C(8)-N(1)    | 122.53(13) |
| O(2)-C(8)-C(7)    | 122.27(13) |
| N(1)-C(8)-C(7)    | 115.17(12) |
| N(1)-C(9)-C(11)   | 110.60(11) |
| N(1)-C(9)-C(10)   | 108.92(12) |
| C(11)-C(9)-C(10)  | 110.31(12) |
| N(1)-C(9)-C(1)    | 105.85(10) |
| C(11)-C(9)-C(1)   | 112.03(13) |
| C(10)-C(9)-C(1)   | 108.99(12) |
| C(9)-C(10)-H(10A) | 109.5      |
| C(9)-C(10)-H(10B) | 109.5      |



---

|                     |       |
|---------------------|-------|
| H(10A)-C(10)-H(10B) | 109.5 |
| C(9)-C(10)-H(10C)   | 109.5 |
| H(10A)-C(10)-H(10C) | 109.5 |
| H(10B)-C(10)-H(10C) | 109.5 |
| C(9)-C(11)-H(11A)   | 109.5 |
| C(9)-C(11)-H(11B)   | 109.5 |
| H(11A)-C(11)-H(11B) | 109.5 |
| C(9)-C(11)-H(11C)   | 109.5 |
| H(11A)-C(11)-H(11C) | 109.5 |
| H(11B)-C(11)-H(11C) | 109.5 |
| O(1)-C(12)-H(12A)   | 109.5 |
| O(1)-C(12)-H(12B)   | 109.5 |
| H(12A)-C(12)-H(12B) | 109.5 |
| O(1)-C(12)-H(12C)   | 109.5 |
| H(12A)-C(12)-H(12C) | 109.5 |
| H(12B)-C(12)-H(12C) | 109.5 |
| O(3)-C(13)-H(13A)   | 109.5 |
| O(3)-C(13)-H(13B)   | 109.5 |
| H(13A)-C(13)-H(13B) | 109.5 |
| O(3)-C(13)-H(13C)   | 109.5 |
| H(13A)-C(13)-H(13C) | 109.5 |
| H(13B)-C(13)-H(13C) | 109.5 |

---

Symmetry transformations used to generate equivalent atoms:

**Table 4. Anisotropic displacement parameters ( $\text{\AA}^2 \times 10^3$ ) for 18a.**

**The anisotropic displacement factor exponent takes the form:**

$$-2 \pi^2 [ h^2 a^{*2} U_{11} + \dots + 2 h k a^* b^* U_{12} ]$$


---

|       | U11   | U22   | U33   | U23   | U13   | U12   |
|-------|-------|-------|-------|-------|-------|-------|
| O(1)  | 52(1) | 37(1) | 34(1) | 5(1)  | 7(1)  | 3(1)  |
| O(2)  | 48(1) | 51(1) | 61(1) | -4(1) | 9(1)  | 23(1) |
| O(3)  | 53(1) | 45(1) | 41(1) | 0(1)  | 3(1)  | 5(1)  |
| N(1)  | 36(1) | 32(1) | 32(1) | 5(1)  | 4(1)  | 7(1)  |
| C(1)  | 34(1) | 40(1) | 41(1) | 11(1) | 12(1) | 11(1) |
| C(2)  | 35(1) | 35(1) | 34(1) | 13(1) | 9(1)  | 11(1) |
| C(3)  | 42(1) | 39(1) | 39(1) | 11(1) | 11(1) | 16(1) |
| C(4)  | 47(1) | 33(1) | 30(1) | 8(1)  | 5(1)  | 7(1)  |
| C(5)  | 35(1) | 45(1) | 42(1) | 13(1) | 3(1)  | 6(1)  |
| C(6)  | 37(1) | 44(1) | 41(1) | 12(1) | 10(1) | 16(1) |
| C(7)  | 35(1) | 33(1) | 34(1) | 12(1) | 7(1)  | 9(1)  |
| C(8)  | 39(1) | 35(1) | 39(1) | 11(1) | 8(1)  | 11(1) |
| C(9)  | 32(1) | 39(1) | 40(1) | 15(1) | 9(1)  | 11(1) |
| C(10) | 34(1) | 61(1) | 53(1) | 10(1) | 5(1)  | 7(1)  |
| C(11) | 58(1) | 54(1) | 57(1) | 31(1) | 14(1) | 17(1) |
| C(12) | 76(1) | 35(1) | 62(1) | 9(1)  | 17(1) | -2(1) |
| C(13) | 61(1) | 53(1) | 44(1) | 7(1)  | -8(1) | -2(1) |

**Table 5. Hydrogen coordinates (  $\times 10^4$ ) and isotropic displacement parameters ( $\text{\AA}^2 \times 10^3$ ) for 18a.**

|       | x     | y    | z    | U(eq) |
|-------|-------|------|------|-------|
| H(1A) | -1954 | 2088 | 8639 | 47    |

---

|        |       |       |       |    |
|--------|-------|-------|-------|----|
| H(1B)  | -1946 | 277   | 8920  | 47 |
| H(3)   | 657   | 3976  | 10580 | 48 |
| H(5)   | 5738  | 3055  | 10736 | 51 |
| H(6)   | 4461  | 428   | 8939  | 49 |
| H(10A) | -4238 | -1655 | 5633  | 80 |
| H(10B) | -4649 | -61   | 6688  | 80 |
| H(10C) | -4205 | -1772 | 6996  | 80 |
| H(11A) | -102  | 1762  | 6642  | 80 |
| H(11B) | -2117 | 2076  | 6397  | 80 |
| H(11C) | -1665 | 439   | 5404  | 80 |
| H(12A) | -865  | -4767 | 6346  | 93 |
| H(12B) | -2166 | -5500 | 4921  | 93 |
| H(12C) | -2939 | -4623 | 6087  | 93 |
| H(13A) | 6222  | 4953  | 12849 | 91 |
| H(13B) | 6097  | 7000  | 13297 | 91 |
| H(13C) | 6547  | 6109  | 11986 | 91 |

---

**Table 6. Torsion angles [deg] for 18a.**

---

|                      |             |
|----------------------|-------------|
| C(12)-O(1)-N(1)-C(8) | 90.36(15)   |
| C(12)-O(1)-N(1)-C(9) | -122.29(13) |
| C(9)-C(1)-C(2)-C(3)  | 150.56(13)  |
| C(9)-C(1)-C(2)-C(7)  | -31.53(18)  |
| C(7)-C(2)-C(3)-C(4)  | 0.2(2)      |
| C(1)-C(2)-C(3)-C(4)  | 178.14(14)  |
| C(13)-O(3)-C(4)-C(5) | -2.7(2)     |
| C(13)-O(3)-C(4)-C(3) | 177.67(12)  |
| C(2)-C(3)-C(4)-O(3)  | 179.64(13)  |

|                      |             |
|----------------------|-------------|
| C(2)-C(3)-C(4)-C(5)  | 0.0(2)      |
| O(3)-C(4)-C(5)-C(6)  | -179.86(14) |
| C(3)-C(4)-C(5)-C(6)  | -0.2(2)     |
| C(4)-C(5)-C(6)-C(7)  | 0.2(2)      |
| C(5)-C(6)-C(7)-C(2)  | 0.0(2)      |
| C(5)-C(6)-C(7)-C(8)  | -179.81(14) |
| C(3)-C(2)-C(7)-C(6)  | -0.2(2)     |
| C(1)-C(2)-C(7)-C(6)  | -178.21(13) |
| C(3)-C(2)-C(7)-C(8)  | 179.55(13)  |
| C(1)-C(2)-C(7)-C(8)  | 1.5(2)      |
| O(1)-N(1)-C(8)-O(2)  | -16.68(19)  |
| C(9)-N(1)-C(8)-O(2)  | -160.20(13) |
| O(1)-N(1)-C(8)-C(7)  | 165.41(11)  |
| C(9)-N(1)-C(8)-C(7)  | 21.90(19)   |
| C(6)-C(7)-C(8)-O(2)  | 6.7(2)      |
| C(2)-C(7)-C(8)-O(2)  | -173.02(13) |
| C(6)-C(7)-C(8)-N(1)  | -175.35(12) |
| C(2)-C(7)-C(8)-N(1)  | 4.9(2)      |
| C(8)-N(1)-C(9)-C(11) | 72.25(16)   |
| O(1)-N(1)-C(9)-C(11) | -71.37(15)  |
| C(8)-N(1)-C(9)-C(10) | -166.35(13) |
| O(1)-N(1)-C(9)-C(10) | 50.03(15)   |
| C(8)-N(1)-C(9)-C(1)  | -49.29(17)  |
| O(1)-N(1)-C(9)-C(1)  | 167.09(10)  |
| C(2)-C(1)-C(9)-N(1)  | 51.04(16)   |
| C(2)-C(1)-C(9)-C(11) | -69.59(15)  |
| C(2)-C(1)-C(9)-C(10) | 168.05(12)  |

---

Symmetry transformations used to generate equivalent atoms:
